# Supplementary material for: Use of progestogens and the risk of intracranial meningioma: national case-control study
Source: PubMed Central journal article supplement — BMJ. 2024 Mar 27;384:e078078. doi: 10.1136/bmj-2023-078078 (PMC10966896; doi:10.1136/bmj-2023-078078), 2024-03-27
Supplement: roln078078.ww.pdf [file roln078078.ww.pdf]

# SUPPLEMENTARY MATERIAL

- Table A. List of the main countries where progestogens of interest are authorized (2022) ..... 3
- Table B. List of procedures related to intracranial meningioma excision surgery ..... 6
- Table C. Classification of progestogens and doses involved in the study..... 7
- Table D. List of ATC and CIP codes for the progestogens ..... 8
- Table E. WHO classification of intracranial meningiomas..... 13
- Table F. CIM-10 and CCAM codes used to identify radiotherapy procedures ..... 14
- Table G. List of ATC codes used to identify antiepileptic drugs ..... 17
- Table H. List of LPP codes for copper intrauterine devices..... 18
- Table I. Description of cases and controls for the analyses of 52 mg levonorgestrel and copper intrauterine devices (inclusion period restricted to 2011-2018) ..... 19
- Table J. Description of cases and controls for analyses of levonorgestrel 13.5 mg intrauterine devices (inclusion period restricted to 2017-2018)..... 21
- Table K. Cumulative dose exposure for each progestogen in cases and controls ..... 23
- Table L. Duration of exposure to medrogestone, medroxyprogesterone acetate, promegestone, chlormadinone acetate, nomegestrol acetate and cyproterone acetate in exposed cases (N = 18,061) and controls (N=90,305) ..... 24
- Table M. Association between exposure to medrogestone, medroxyprogesterone acetate, and promegestone and risk of surgically treated intracranial meningioma: analyses by age group, location, and severity grade..... 25
- Table N. Association between exposure to chlormadinone acetate, nomegestrol acetate, and cyproterone acetate and the risk of surgically treated intracranial meningioma : analyses by age group, location, and grade of severity ..... 26
- Table O. Numbers and percentage of meningiomas located in the anterior base or the mid-base of the skull among exposed and non-exposed cases ..... 27
- Table P. Associations between exposure to oral, intra-vaginal, intra-muscular, or percutaneous progestogens and the risk of surgically treated intracranial meningioma , with all the modes of exposure used ..... 28
- Table Q. Associations between exposure to progestogens in intrauterine systems and copper intrauterine devices and the risk of surgically treated intracranial meningioma , with all the modes of exposure used..... 29
- Table R. Associations between exposure to oral, percutaneous, intra-vaginal, and intra-muscular progestogen and risk of surgically-treated intracranial meningioma, and by sub-class..... 30
- Table S. SAS code of statistical analysis ..... 31
- Figure A. Flowchart for the analysis of levonorgestrel 52 mg IUS (restricted inclusion period: 2011-2018) ..... 40

Figure B. Flowchart for the analysis of levonorgestrel 13.5 mg IUS (restricted inclusion period: 2017-2018) ..... 40

Figure C. Forest plot representing the associations between exposure to oral, intravaginal, intramuscular, or percutaneous progestogens and the risk of meningioma requiring surgery 41

Figure D. Number of attributable cases of intracranial meningioma requiring surgery, by progestogen, for the 2009-2018 period..... 42

**Table A. List of the main countries where progestogens of interest are authorized (2022)**

| <b>Product</b>             | <b>Main countries where the product is authorized*</b>                                                                                                                                                                                                                                                                                                                                                                                                                                                                                                                                                                                                                                                                                                                                                                                                                                                         |
|----------------------------|----------------------------------------------------------------------------------------------------------------------------------------------------------------------------------------------------------------------------------------------------------------------------------------------------------------------------------------------------------------------------------------------------------------------------------------------------------------------------------------------------------------------------------------------------------------------------------------------------------------------------------------------------------------------------------------------------------------------------------------------------------------------------------------------------------------------------------------------------------------------------------------------------------------|
| <b>Progesterone</b>        | <p>Europe (Austria, Belgium, Bosnia, Bulgaria, Croatia, Cyprus, Czech Republic, Denmark, Estonia, Finland, France, Georgia, Germany, Greece, Hungary, Iceland, Ireland, Italy, Latvia, Lithuania, Luxembourg, Macedonia, Malta, Monaco, Poland, Portugal, Netherlands, Norway, Romania, Serbia, Slovakia, Slovenia, Spain, Sweden, Switzerland, Turkey, United Kingdom)</p> <p>Africa (Algeria, Egypt, Morocco, South Africa, Tunisia)</p> <p>Asia (Bangladesh, China, India, Indonesia, Israel, Japan, Kuwait, Lebanon, Malaysia, Myanmar, Oman, Pakistan, Philippines, Saudi Arabia, Singapore, South Korea, Taiwan, Vietnam)</p> <p>North America (Canada, Mexico, USA)</p> <p>South America and Central America (Argentina, Belize, Brazil, Chile, Colombia, Ecuador, El Salvador, Guatemala, Honduras, Nicaragua, Panama, Paraguay, Peru, Uruguay, Venezuela)</p> <p>Oceania (Australia, New Zealand)</p> |
| <b>Hydroxyprogesterone</b> | <p>Europe (Austria, Bosnia, Czech Republic, France, Georgia, Italy, Serbia, Turkey)</p> <p>Africa (Egypt)</p> <p>Asia (Bhutan, Brunei, China, India, Japan, Lebanon, Oman, Singapore, Taiwan, Thailand)</p> <p>North America (Mexico, USA)</p> <p>South America and Central America (Argentina, Belize, Brazil, Colombia, Ecuador, El Salvador, Guatemala, Honduras, Nicaragua, Panama)</p>                                                                                                                                                                                                                                                                                                                                                                                                                                                                                                                    |
| <b>Dydrogesterone</b>      | <p>Europe (Austria, Belgium, Bosnia, Bulgaria, Croatia, Cyprus, Czech Republic, Estonia, France, Georgia, Germany, Greece, Hungary, Ireland, Italy, Latvia, Lithuania, Luxembourg, Macedonia, Malta, Poland, Portugal, Netherlands, Romania, Serbia, Slovakia, Switzerland, Turkey, United Kingdom)</p> <p>Africa (Egypt, South Africa, Tunisia)</p> <p>Asia (China, India, Indonesia, Israel, Japan, Kuwait, Lebanon, Malaysia, Oman, Pakistan, Philippines, Russia, Singapore, Taiwan)</p> <p>North America (Mexico)</p> <p>South America and Central America (Brazil, Chile, Colombia, Venezuela)</p> <p>Oceania (Australia)</p>                                                                                                                                                                                                                                                                            |
| <b>Medrogestone</b>        | <p>Europe (France, Germany)</p>                                                                                                                                                                                                                                                                                                                                                                                                                                                                                                                                                                                                                                                                                                                                                                                                                                                                                |

|                                                        |                                                                                                                                                                                                                                                                                                                                                                                                                                                                                                                                                                                                                                                                                                                                                                                                                                                                                                                                                                                                                                                                                                                                                                                                                                                                                                                                                                                                                                                                                                            |
|--------------------------------------------------------|------------------------------------------------------------------------------------------------------------------------------------------------------------------------------------------------------------------------------------------------------------------------------------------------------------------------------------------------------------------------------------------------------------------------------------------------------------------------------------------------------------------------------------------------------------------------------------------------------------------------------------------------------------------------------------------------------------------------------------------------------------------------------------------------------------------------------------------------------------------------------------------------------------------------------------------------------------------------------------------------------------------------------------------------------------------------------------------------------------------------------------------------------------------------------------------------------------------------------------------------------------------------------------------------------------------------------------------------------------------------------------------------------------------------------------------------------------------------------------------------------------|
|                                                        | Africa (Tunisa, Egypt)                                                                                                                                                                                                                                                                                                                                                                                                                                                                                                                                                                                                                                                                                                                                                                                                                                                                                                                                                                                                                                                                                                                                                                                                                                                                                                                                                                                                                                                                                     |
| <b>Medroxyprogesterone acetate 150 mg/ml injection</b> | <p>Europe (Austria, Belgium, Bosnia, Bulgaria, Cyprus, Czech Republic, Denmark, Estonia (withdrawn in 2017), Finland (withdrawn in 2018), France, Georgia (withdrawn in 2010), Germany, Hungary, Ireland, Italy, Latvia, Lithuania, Luxembourg, Macedonia (withdrawn in 2018), Malta, Monaco, Poland, Portugal, Netherlands, Norway, Romania, Serbia, Slovakia, Slovenia, Spain, Sweden, Switzerland, Turkey, Ukraine, United Kingdom)</p> <p>Africa (Benin, Botswana, Burkina Faso, Burundi, Cameroon, Central African Republic, Chad, Congo, Côte d'Ivoire, Egypt, Ethiopia, Ghana, Guinea, Kenya, Liberia, Madagascar, Malawi, Mali, Mauritania, Namibia, Niger, Nigeria, Rwanda, Senegal, South Africa, Sudan, Tanzania, Togo, Tunisia, Uganda, Zambia, Zimbabwe)</p> <p>Asia (Bangladesh, Bahrain, China (withdrawn in 2015), India, Indonesia, Iraq, Israel, Japan, Jordan, Kuwait, Lebanon, Macao, Malaysia, Mauritius, Mongolia, Myanmar, Nepal, Oman, Pakistan, Palestine, Philippines, Qatar, Russia, Saudi Arabia, Singapore (withdrawn in 2015), Sri Lanka, Taiwan, Uzbekistan (withdrawn in 2017), Vietnam, United Arab Emirates, Yemen)</p> <p>North America (Canada, Mexico, USA)</p> <p>South America and Central America (Argentina, Bahamas, Belize, Bolivia, Brazil, Chile (withdrawn in 2022), Costa Rica, Curacao, El Salvador, Guatemala, Honduras, Jamaica, Nicaragua, Panama, Paraguay, Peru, Trinidad and Tobago, Uruguay, Venezuela)</p> <p>Oceania (Australia, New Zealand)</p> |
| <b>Promegestone</b>                                    | Europe (France)                                                                                                                                                                                                                                                                                                                                                                                                                                                                                                                                                                                                                                                                                                                                                                                                                                                                                                                                                                                                                                                                                                                                                                                                                                                                                                                                                                                                                                                                                            |
| <b>Dienogest</b>                                       | <p>Europe (Austria, Belgium, Bosnia, Bulgaria, Croatia, Cyprus, Czech Republic, Denmark, Estonia, Finland, France, Georgia, Germany, Greece, Hungary, Iceland, Ireland, Italy, Latvia, Lithuania, Luxembourg, Macedonia, Malta, Poland, Portugal, Netherlands, Norway, Romania, Serbia, Slovakia, Slovenia, Spain, Sweden, Switzerland, Turkey, United Kingdom)</p> <p>Africa (South Africa, Tunisia)</p> <p>Asia (Israel, Malaysia, Oman, Philippines, Russia, Singapore, Thailand)</p> <p>North America (Canada, USA)</p> <p>South America and Central America (Argentina, Brazil, Chile, Colombia, Dominican republic, Ecuador, El Salvador, Guatemala, Haiti, Honduras, Mexico, Nicaragua, Panama, Peru, Uruguay)</p> <p>Oceania (Australia)</p>                                                                                                                                                                                                                                                                                                                                                                                                                                                                                                                                                                                                                                                                                                                                                       |
| <b>Levonorgestrel intra-uterine systems</b>            | Europe (Albania, Austria, Belarus, Belgium, Bosnia, Bulgaria, Croatia, Cyprus, Czech Republic, Denmark, Estonia, Finland, France, Georgia, Germany, Greece, Kosovo, Hungary, Iceland, Ireland, Italy, Latvia, Lichtenstein, Lithuania, Luxembourg, Macedonia, Malta, Moldavia, Montenegro, Poland, Portugal, Netherlands, Norway, Romania, Serbia, Slovakia, Slovenia, Spain, Sweden, Switzerland, Turkey, Ukraine, United Kingdom)                                                                                                                                                                                                                                                                                                                                                                                                                                                                                                                                                                                                                                                                                                                                                                                                                                                                                                                                                                                                                                                                        |

---

Africa (Algeria, Botswana, Cameroun, Côte d'Ivoire, Egypt, Ethiopia, Gabon, Ghana, Kenya, Madagascar, Mauritius, Mozambique, Morocco, Namibia, Nigeria, Rwanda, Saudi Arabia, Senegal, Sierra Leone, South Africa, Syria, Togo, Tunisia, Uganda,)

Asia (Afghanistan, Azerbaijan, Bahrain, Brunei, Cambodia, China, India, Indonesia, Japan, Kazakhstan, Kirghizstan, Kuwait, Iraq, Iran, Israel, Jordan, Lebanon, Malaysia, Mongolia, Myanmar, Oman, , Palestine, Pakistan Philippines, Qatar, Russia, Singapore, South Korea, Sri Lanka, Tajikistan, Taiwan, Thailand, Turkmenistan, United Arab Emirates, Uzbekistan, Vietnam)

North America (Canada, Mexico, USA)

South America and Central America (Argentina, Aruba, Brazil, Chile, Colombia, Costa Rica, Cuba, Curacao, Dominican Republic, Ecuador, El Salvador, Guatemala, Haiti, Honduras, Jamaica, Nicaragua, Panama, Paraguay, Peru, , Surinam, Uruguay, Venezuela)

Oceania (Australia, New Zealand)

---

\* approved, but not necessarily marketed

*Sources: French National Agency for Medicines and Health Products Safety*

**Table B. List of procedures related to intracranial meningioma excision surgery**

| CCAM label/meningioma localisation                                                                                                                          | CCAM code |
|-------------------------------------------------------------------------------------------------------------------------------------------------------------|-----------|
| <b>Anterior skull base</b>                                                                                                                                  |           |
| Excision of a tumor from the anterior skull base, by unilateral frontal craniotomy                                                                          | ACFA001   |
| Excision of tumors from the anterior part of the skull base, by bilateral frontal craniotomy                                                                | ACFA015   |
| Excision of tumors from the optochiasmatic and/or hypothalamic region, by craniotomy                                                                        | ACFA022   |
| Excision of tumors from the anterior skull base, by bilateral frontal craniotomy and ethmoidal approach                                                     | ACFA026   |
| <b>Middle of the skull base</b>                                                                                                                             |           |
| Excision of tumors from the middle part of the skull base, by craniotomy                                                                                    | ACFA011   |
| Excision of a tumor from the tip of the rock, using a translabyrinthine approach                                                                            | ACFA003   |
| Excision of a tumor from the tip of the rock, without rerouting the facial nerve, by transpetrous approach                                                  | ACFA006   |
| Excision of rock tip tumor, using suprapetrous approach                                                                                                     | ACFA009   |
| Excision of a tumor of the tip of the rock with diversion of the facial nerve, using the transpetrous approach                                              | ACFA029   |
| Excision of a tumor from the inner third of the middle layer of the skull involving the sphenoorbital angle, by craniotomy                                  | ACFA013   |
| Excision of a lesion from the orbit, by a lateral approach                                                                                                  | BKFA001   |
| Excision of a lesion from the orbit, by a conjunctivopalpebral approach                                                                                     | BKFA002   |
| Excision of a lesion from the orbit, by a coronal approach                                                                                                  | BKFA003   |
| Excision of a lesion from the pituitary space (sella turcica), by a transsphenoidal approach                                                                | KAFA001   |
| Excision of a lesion of the pituitary space (sella turcica), by craniotomy                                                                                  | KAFA001   |
| Excision of a lesion of the pituitary space (sella turcica), by transsphenoidal videosurgery                                                                | KAFE900   |
| <b>Posterior skull base</b>                                                                                                                                 |           |
| Excision of a tumor of the pontocerebellar angle and/or internal acoustic meatus [internal auditory canal], using a presigmoid retrolabyrinthine approach   | ACFA005   |
| Excision of a tumor from the pontocerebellar angle and/or internal acoustic meatus [internal auditory canal], using a translabyrinthine approach            | ACFA007   |
| Excision of a tumor from the pontocerebellar angle and/or internal acoustic meatus [internal auditory meatus], via the retrosigmoid infraoccipital approach | ACFA010   |
| Excision of a tumor in the pontocerebellar angle and/or internal acoustic meatus [internal auditory canal], via suprapetrous approach                       | ACFA012   |
| Excision of a tumor from the pontocerebellar angle and/or internal acoustic meatus [internal auditory meatus], via two approaches                           | ACFA014   |
| Excision of a tumor from the cerebellum tenta, by subtentorial craniotomy                                                                                   | ACFA008   |
| Excision of an extraparenchymal tumor of the convexity of the cerebellum invading a dural venous sinus, by craniotomy                                       | ACFA018   |
| Excision of a tumor of the clivus, by craniotomy                                                                                                            | ACFA004   |
| Excision of a tumor of the clivus, by transoral or nasosphenoidal approach                                                                                  | ACFA020   |
| Excision of a tumor from the jugular foramen, by craniotomy                                                                                                 | ACFA023   |
| Excision of a tumor from the foramen magnum without rerouting the vertebral artery, by craniotomy                                                           | ACFA024   |
| Excision of a tumor from the petroclival region without rerouting the facial nerve, via transpetrous approach                                               | ACFA016   |
| Excision of a tumor in the petroclival region with facial nerve diversion, using a transpetrous approach                                                    | ACFA025   |
| Excision of a tumor from the petroclival region with diversion of the facial nerve, by craniotomy                                                           | ACFA019   |
| Excision of a tumor from the pontocerebellar angle and/or the internal acoustic meatus [internal auditory meatus], using a transotic approach               | ACFA027   |
| <b>Convexity</b>                                                                                                                                            |           |
| Excision of an extraparenchymal tumor of the convexity of the brain invading a dural venous sinus, by craniotomy                                            | ACFA028   |
| Excision of an extraparenchymal tumor of the convexity of the brain without dural venous sinus involvement, by craniotomy                                   | ACFA002   |
| <b>Falx and tentorium</b>                                                                                                                                   |           |
| Excision of a tumor from the tentorium cerebelli, by infratentorial craniotomy                                                                              | ABFA008   |
| Excision of a tumor from the notch of the tentorium, by supratentorial craniotomy                                                                           | ABFA009   |
| Excision of a falx cerebri tumor by craniotomy                                                                                                              | ABFA010   |
| <b>Other sites</b>                                                                                                                                          |           |
| Resection of a tumor in the 3rd ventricle, by craniotomy                                                                                                    | ABFA002   |
| Resection of a tumor in the lateral ventricle, by craniotomy                                                                                                | ABFA005   |
| Resection of a tumor in the 4th ventricle, by craniotomy                                                                                                    | ABFA006   |
| Resection of a tumor in the 3rd ventricle, by intracranial videosurgery                                                                                     | ABFC001   |
| Resection of a tumor in the lateral ventricle by intracranial video surgery                                                                                 | ABFC002   |
| Decompression of the optic nerve, by craniotomy                                                                                                             | ADPA001   |
| Decompression of the optic nerve, by an orbital approach                                                                                                    | ADPA020   |
| Decompression of the optic nerve, by a transsinus approach (transethmoidal)                                                                                 | ADPA023   |
| Decompression of the infraorbital nerve, by a direct approach                                                                                               | ADPA016   |
| Decompression of the facial nerve, by a transmastoid approach                                                                                               | ADPA008   |
| Decompression of the facial nerve, by a suprapetrous approach                                                                                               | ADPA011   |
| Decompression of the facial nerve, by a transmastoid and suprapetrous approach                                                                              | ADPA021   |

Abbreviations: CCAM, *Classification Commune des Actes Médicaux* (common classification for medical acts)

**Table C. Classification of progestogens and doses involved in the study**

| <b>Progesterone derivatives</b>                                           | <b>Testosterone derivatives</b>                                                       | <b>Spirolactone derivatives</b> |
|---------------------------------------------------------------------------|---------------------------------------------------------------------------------------|---------------------------------|
| <b>Progesterone</b>                                                       | <b>Estranes</b>                                                                       | <b>Spirolactone</b>             |
| - Progesterone (oral and intra-vaginal: 100, 200 mg; percutaneous: 25 mg) | - Dienogest (alone: not reimbursed/data not available; combined with oestrogen: 2 mg) | - Spirolactone (25, 50, 75 mg)  |
| <b>Dydrogesterone</b>                                                     | - <i>Norethisterone (not reimbursed)</i>                                              |                                 |
| - Dydrogesterone (alone : 10 mg; combined with oestrogen : 5,10 mg)       | - <i>Norgestrienone (not marketed)</i>                                                |                                 |
| <b>17-OH-progesterone</b>                                                 | <b>Gonanes</b>                                                                        | <b>Drospirenone</b>             |
| - Hydroxyprogesterone (500 mg)                                            | - Levonorgestrel IUS (13.5 , 52 mg, )                                                 | - <i>Not reimbursed</i>         |
| - Medrogestone (5 mg)                                                     | - <i>Desogestrel (not covered by the study)</i>                                       |                                 |
| - Chlormadinone acetate (5, 10 mg)                                        | - <i>Etonogestrel (not covered by the study)</i>                                      |                                 |
| - Cyproterone acetate (50, 100 mg)                                        | - <i>Gestodene (not reimbursed)</i>                                                   |                                 |
| - Medroxyprogesterone acetate (150 mg)                                    | - <i>Norgestimate (not reimbursed)</i>                                                |                                 |
| - <i>Megestrol acetate (palliative treatment)</i>                         | - <i>Norgestrel (not reimbursed)</i>                                                  |                                 |
| <b>19-nor-progesterone</b>                                                |                                                                                       |                                 |
| - Nomegestrol acetate (3.75, 5 mg)                                        |                                                                                       |                                 |
| - Promegestone (0.125, 0.25, 0.5 mg)                                      |                                                                                       |                                 |
| - <i>Demegestone (not marketed)</i>                                       |                                                                                       |                                 |
| - <i>Trimegestone (not marketed)</i>                                      |                                                                                       |                                 |
| - <i>Nestorone (not marketed)</i>                                         |                                                                                       |                                 |

Abbreviations: IUS, intra-uterine system; mg, milligram

All names in *italics* refer to products that have not been studied for a reason specified in brackets corresponding to the situation of the drug in France

**Table D. List of ATC and CIP codes for the progestogens**

| <b>CIP label</b>                                    | <b>CIP code</b> | <b>ATC class</b>          | <b>ATC code</b> |
|-----------------------------------------------------|-----------------|---------------------------|-----------------|
| COLPRONE 5MG TAB 20                                 | 3130861         | MEDROGESTONE              | G03DB03         |
| PROGESTOGEL 1% GEL 1                                | 3131412         | PROGESTERONE              | G03DA04         |
| UTROGESTAN 100MG CAPSULE 30                         | 3232751         | PROGESTERONE              | G03DA04         |
| ESTIMA 200MG CAPSULE 15                             | 3567138         | PROGESTERONE              | G03DA04         |
| EVAPAUSE 100MG CAPSULE GE 0                         | 3559251         | PROGESTERONE              | G03DA04         |
| ESTIMA 100MG CAPSULE 30                             | 3521828         | PROGESTERONE              | G03DA04         |
| UTROGESTAN 200MG CAPSULE 15                         | 3483996         | PROGESTERONE              | G03DA04         |
| PROGESTERONE BGA 100MG CAPSULE 30                   | 3580498         | PROGESTERONE              | G03DA04         |
| PROGESTERONE BGA 200MG CAPSULE 15                   | 3582505         | PROGESTERONE              | G03DA04         |
| PROGESTERONE RATIOPHARM 100 MG 1 BOX OF 30 CAPSULES | 3436896         | PROGESTERONE              | G03DA04         |
| MENAELLE 100MG CAPSULE 30                           | 3521751         | PROGESTERONE              | G03DA04         |
| PROGESTERONE SDZ 100MG CAPSULE 30                   | 3680739         | PROGESTERONE              | G03DA04         |
| ESTIMA 100MG CAPSULE 90                             | 3741501         | PROGESTERONE              | G03DA04         |
| ESTIMA 200MG CAPSULE 45                             | 3741487         | PROGESTERONE              | G03DA04         |
| PROGESTERONE TVC 100MG CAPSULE 30                   | 3603733         | PROGESTERONE              | G03DA04         |
| PROGESTERONE GNR 100MG CAPSULE 30                   | 3613720         | PROGESTERONE              | G03DA04         |
| PROGESTERONE RATIOPHARM 200 MG 1 BOX OF 15 CAPSULES | 3620915         | PROGESTERONE              | G03DA04         |
| PROGESTAN 100MG CAPSULE 30                          | 3620884         | PROGESTERONE              | G03DA04         |
| PROGESTAN 200MG CAPSULE 15                          | 3620849         | PROGESTERONE              | G03DA04         |
| PROGESTERONE VIATRIS 100 MG CAPSULE 30              | 3617899         | PROGESTERONE              | G03DA04         |
| UTROGESTAN 200MG CAPSULE 45                         | 3587684         | PROGESTERONE              | G03DA04         |
| UTROGESTAN 100MG CAPSULE 60                         | 3587678         | PROGESTERONE              | G03DA04         |
| PROGESTAN 200MG CAPSULE 45                          | 3587632         | PROGESTERONE              | G03DA04         |
| PROGESTAN 100MG CAPSULE 90                          | 3581138         | PROGESTERONE              | G03DA04         |
| MENAELLE 100MG CAPSULE 90                           | 3878602         | PROGESTERONE              | G03DA04         |
| PROGESTERONE BGA 200MG CAPSULE 45                   | 3979332         | PROGESTERONE              | G03DA04         |
| PROGESTERONE SDZ 100MG CAPSULE 90                   | 3008223         | PROGESTERONE              | G03DA04         |
| PROGESTERONE VIATRIS 100 MG CAPSULE 90              | 3002452         | PROGESTERONE              | G03DA04         |
| DUPHASTON 10MG TAB 10                               | 3219294         | DYDROGESTERONE            | G03DB01         |
| CLIMASTON 1 MG/5 MG TAB 28                          | 3566038         | DYDROGESTERONE + ESTROGEN | G03FA14         |
| CLIMASTON 1 MG/10 MG TAB 28                         | 3526435         | DYDROGESTERONE + ESTROGEN | G03FB08         |
| CLIMASTON 2MG/10MG TAB 28                           | 3438524         | DYDROGESTERONE + ESTROGEN | G03FB08         |
| SAWIS 2MG TAB 28                                    | 3018636         | DIENOGEST                 | G03DB08         |
| DIMETRUM 2MG TAB 28                                 | 3016968         | DIENOGEST                 | G03DB08         |
| ENDOVELA 2MG TAB 28                                 | 3019872         | DIENOGEST                 | G03DB08         |
| DIMETRUM 2MG TAB 84                                 | 3021127         | DIENOGEST                 | G03DB08         |
| ENDOVELA 2MG TAB 84                                 | 3022086         | DIENOGEST                 | G03DB08         |
| SAWIS 2MG TAB 84                                    | 3021939         | DIENOGEST                 | G03DB08         |
| CLIMODIENE 2MG/2MG TAB 28                           | 3576232         | DIENOGEST + ESTROGEN      | G03FA15         |
| SURGESTONE 0.5MG TAB 10                             | 3313314         | PROMEGESTONE              | G03DB07         |
| SURGESTONE 0.5MG TAB 12                             | 3364286         | PROMEGESTONE              | G03DB07         |
| SURGESTONE 0.25MG TAB 10                            | 3249183         | PROMEGESTONE              | G03DB07         |
| SURGESTONE 0.125MG TAB 10                           | 3249154         | PROMEGESTONE              | G03DB07         |
| LUTENYL 5MG TAB 10                                  | 3266112         | NOMEGESTROL               | G03DB04         |
| NOMEGESTROL ARW 5MG TAB 10                          | 3869187         | NOMEGESTROL               | G03DB04         |
| NOMEGESTROL TVC 5MG TAB 10                          | 3828024         | NOMEGESTROL               | G03DB04         |
| NOMEGESTROL SDZ 5MG TAB 10                          | 3901620         | NOMEGESTROL               | G03DB04         |
| NOMEGESTROL ZEN 5MG TAB 10                          | 3869253         | NOMEGESTROL               | G03DB04         |
| NOMEGESTROL BGA 5MG TAB 10                          | 3817345         | NOMEGESTROL               | G03DB04         |
| NOMEGESTROL RTP 5MG TAB 10                          | 3832391         | NOMEGESTROL               | G03DB04         |
| LUTENYL 3.75MG TAB 14                               | 3655724         | NOMEGESTROL               | G03DB04         |
| NOMEGESTROL VIATRIS 5MG TAB 10                      | 3645370         | NOMEGESTROL               | G03DB04         |
| NOMEGESTROL EG 5MG TAB 10                           | 3817279         | NOMEGESTROL               | G03DB04         |
| NAEMIS TAB 24                                       | 3584622         | NOMEGESTROL + ESTROGEN    | G03FB12         |
| LUTERAN 5MG TAB 10                                  | 3063320         | CHLORMADINONE             | G03DB06         |
| LUTERAN 2 MG                                        | 3063314         | CHLORMADINONE             | G03DB06         |
| LUTERAN 10MG TAB 12                                 | 3394330         | CHLORMADINONE             | G03DB06         |
| CHLORMADINONE TVC 10MG TAB 12                       | 3656184         | CHLORMADINONE             | G03DB06         |
| CHLORMADINONE TVC 5MG TAB 10                        | 3652631         | CHLORMADINONE             | G03DB06         |



|                                                             |         |                      |         |
|-------------------------------------------------------------|---------|----------------------|---------|
| CHLORMADINONE SDZ 5MG TAB 10                                | 3656014 | CHLORMADINONE        | G03DB06 |
| CHLORMADINONE SANDOZ 2MG TAB 10                             | 3652660 | CHLORMADINONE        | G03DB06 |
| CHLORMADINONE VIATRIS 10MG TAB 12                           | 3664746 | CHLORMADINONE        | G03DB06 |
| CHLORMADINONE SDZ 10MG TAB 12                               | 3664752 | CHLORMADINONE        | G03DB06 |
| CHLORMADINONE SANDOZ 2MG TAB 10                             | 3652660 | CHLORMADINONE        | G03DB06 |
| CHLORMADINONE VIATRIS 10MG TAB 12                           | 3664746 | CHLORMADINONE        | G03DB06 |
| CHLORMADINONE SDZ 10MG TAB 12                               | 3664752 | CHLORMADINONE        | G03DB06 |
| CHLORMADINONE THERAMEX 5 MG TAB 10                          | 3666774 | CHLORMADINONE        | G03DB06 |
| CHLORMADINONE THERAMEX 10MG TAB 12                          | 3664723 | CHLORMADINONE        | G03DB06 |
| CHLORMADINONE MYLAN GENERIQUES 10MG TAB 12                  | 3735216 | CHLORMADINONE        | G03DB06 |
| CHLORMADINONE MYLAN GENERIQUES 5 MG 1 BOITE DE 10,          | 3735222 | CHLORMADINONE        | G03DB06 |
| CHLORMADINONE QUALIMED 5MG TAB 10                           | 3632858 | CHLORMADINONE        | G03DB06 |
| CHLORMADINONE VIATRIS 5MG TAB 10                            | 3632798 | CHLORMADINONE        | G03DB06 |
| ANDROCUR 50MG TAB 20                                        | 3235100 | CYPROTERONE          | G03HA01 |
| ANDROCUR 100MG TAB 60                                       | 3404175 | CYPROTERONE          | G03HA01 |
| CYPROTERONE TVC 50MG TAB 20                                 | 3820525 | CYPROTERONE          | G03HA01 |
| CYPROTERONE ARW 100MG TAB 60                                | 3884459 | CYPROTERONE          | G03HA01 |
| CYPROTERONE ARW 50MG TAB 20                                 | 3884436 | CYPROTERONE          | G03HA01 |
| CYPROTERONE MYL 100MG TAB 60                                | 3693529 | CYPROTERONE          | G03HA01 |
| CYPROTERONE ZEN 50MG TAB 20                                 | 3746651 | CYPROTERONE          | G03HA01 |
| CYPROTERONE TVC 100MG TAB 60                                | 3820620 | CYPROTERONE          | G03HA01 |
| CYPROTERONE BGA 100MG TAB 60                                | 3420168 | CYPROTERONE          | G03HA01 |
| CYPROTERONE ZEN 100MG TAB 60                                | 4160752 | CYPROTERONE          | G03HA01 |
| KALIALE 50 MG GE SCORED TAB 20                              | 3668158 | CYPROTERONE          | G03HA01 |
| CYPROTERONE SDZ 50MG TAB 20                                 | 3766599 | CYPROTERONE          | G03HA01 |
| CYPROTERONE EG 100MG TAB 60                                 | 3694581 | CYPROTERONE          | G03HA01 |
| CYPROTERONE SDZ 100MG TAB 60                                | 3750612 | CYPROTERONE          | G03HA01 |
| CYPROTERONE EG 50MG TAB 20                                  | 3626970 | CYPROTERONE          | G03HA01 |
| CYPROTERONE G GAM 50MG TAB 20                               | 3621889 | CYPROTERONE          | G03HA01 |
| CYPROTERONE BGA 50MG TAB 20                                 | 3423273 | CYPROTERONE          | G03HA01 |
| CYPROTERONE MYL 50MG TAB 20                                 | 3409014 | CYPROTERONE          | G03HA01 |
| ERAPYL 50MG TAB 20                                          | 2675920 | CYPROTERONE          | G03HA01 |
| DEPO PROVERA 150 MG INJ SUSP 1                              | 3238699 | MEDROXYPROGESTERONE  | G03AC06 |
| MIRENA 52MG IUD 1                                           | 3392928 | IUD WITH PROGESTOGEN | G02BA03 |
| LEVONORGESTREL PG 52MG IUD 1                                | 3014875 | IUD WITH PROGESTOGEN | G02BA03 |
| KYLEENA 19.5 MG IUD 1                                       | 3009475 | IUD WITH PROGESTOGEN | G02BA03 |
| JAYDESS 13.5 MG IUD 1                                       | 2741947 | IUD WITH PROGESTOGEN | G02BA03 |
| PROGESTERONE RETARD PHARLON 250MG/1ML 3/1 ML                | 3086580 | HYDROXYPROGESTERONE  | G03DA03 |
| PROGESTERONE RETARD PHAR 500MG INJ 3                        | 3086597 | HYDROXYPROGESTERONE  | G03DA03 |
| PROGESTERONE RETARD PHAR 500MG INJ 1                        | 3086605 | HYDROXYPROGESTERONE  | G03DA03 |
| PROGESTERONE RETARD PHARLON 250MG/1ML 1/1 ML                | 3086628 | HYDROXYPROGESTERONE  | G03DA03 |
| ALDACTONE 75MG CPR 90                                       | 3729606 | SPIRONOLACTONE       | C03DA01 |
| SPIRONOLACTONE RPG 50 MG 1 BOITE DE 90, COMPRENANT 2        | 3729606 | SPIRONOLACTONE       | C03DA01 |
| SPIRONOLACTONE EG 75MG CPR 90                               | 3739131 | SPIRONOLACTONE       | C03DA01 |
| SPIRONOLACTONE G GAM 75 MG 1 BOITE DE 90, COMPRENANT 2      | 3729606 | SPIRONOLACTONE       | C03DA01 |
| SPIRONOLACTONE SDZ 75MG CPR 30                              | 3680834 | SPIRONOLACTONE       | C03DA01 |
| SPIRONOLACTONE PFZ 75MG CPR 90                              | 3729687 | SPIRONOLACTONE       | C03DA01 |
| SPIRONOLACTONE ZEN 75MG CPR 30                              | 3673828 | SPIRONOLACTONE       | C03DA01 |
| SPIRONOLACTONE SDZ 75MG CPR 90                              | 3729204 | SPIRONOLACTONE       | C03DA01 |
| SPIRONOLACTONE TVC 50MG CPR 90                              | 3729061 | SPIRONOLACTONE       | C03DA01 |
| SPIRONOLACTONE RATIOPHARM 75 MG 1 BOITE DE 90, COMPRENANT 2 | 3729606 | SPIRONOLACTONE       | C03DA01 |

|                                                       |         |                |         |
|-------------------------------------------------------|---------|----------------|---------|
| SPIRONOLACTONE EG 50MG CPR 90                         | 3739125 | SPIRONOLACTONE | C03DA01 |
| SPIRONOLACTONE BGA 75 MG CPR 90                       | 3784723 | SPIRONOLACTONE | C03DA01 |
| SPIRONOLACTONE ZEN 50MG CPR 30                        | 3673805 | SPIRONOLACTONE | C03DA01 |
| SPIRONOLACTONE RPG 75 MG 1 BOITE DE 90, COMPOSEE      | 3737259 | SPIRONOLACTONE | C03DA01 |
| ALDACTONE 25MG CPR 90                                 | 3729598 | SPIRONOLACTONE | C03DA01 |
| ALDACTONE 50MG CPR 90                                 | 3723354 | SPIRONOLACTONE | C03DA01 |
| SPIRONOLACTONE RTP 50MG CPR 0                         | 3722260 | SPIRONOLACTONE | C03DA01 |
| SPIRONOLACTONE TVC 75MG CPR 90                        | 3729078 | SPIRONOLACTONE | C03DA01 |
| SPIRONOLACTONE VIATRIS 75MG CPR 90                    | 3738338 | SPIRONOLACTONE | C03DA01 |
| SPIRONOLACTONE PFZ 50MG CPR 90                        | 3729670 | SPIRONOLACTONE | C03DA01 |
| SPIRONOLACTONE BGA 50 MG CPR 90                       | 3784746 | SPIRONOLACTONE | C03DA01 |
| SPIRONOLACTONE VIATRIS 25MG CPR 90                    | 3974257 | SPIRONOLACTONE | C03DA01 |
| SPIRONOLACTONE ARW 50MG CPR 30                        | 3830765 | SPIRONOLACTONE | C03DA01 |
| SPIRONOLACTONE RTP 25MG CPR 30                        | 3967783 | SPIRONOLACTONE | C03DA01 |
| SPIRONOLACTONE CRISTERS 75 MG 1 BOITE DE 90, COMPOSEE | 3737271 | SPIRONOLACTONE | C03DA01 |
| SPIRONOLACTONE ACT 25MG CPR 90                        | 3974406 | SPIRONOLACTONE | C03DA01 |
| SPIRONOLACTONE ACTAVIS 25 MG 1 BOITE DE 30, COMPOSEE  | 3743398 | SPIRONOLACTONE | C03DA01 |
| SPIRONOLACTONE EG 25MG CPR 90                         | 3961527 | SPIRONOLACTONE | C03DA01 |
| SPIRONOLACTONE ZYD 25MG CPR 30                        | 3967820 | SPIRONOLACTONE | C03DA01 |
| SPIRONOLACTONE BGA 25MG CPR 90                        | 3962774 | SPIRONOLACTONE | C03DA01 |
| SPIRONOLACTONE SDZ 50MG CPR 90                        | 3691134 | SPIRONOLACTONE | C03DA01 |
| SPIRONOLACTONE VIATRIS 50MG CPR 90                    | 3690258 | SPIRONOLACTONE | C03DA01 |
| SPIRONOLACTONE VIATRIS 50MG CPR 30                    | 3690229 | SPIRONOLACTONE | C03DA01 |
| SPIRONOLACTONE SDZ 50MG CPR 30                        | 3691074 | SPIRONOLACTONE | C03DA01 |
| SPIRONOLACTONE ZYDUS 75 MG 1 BOITE DE 90, COMPOSEE    | 3737217 | SPIRONOLACTONE | C03DA01 |
| SPIRONOLACTONE ZYD 50MG CPR 30                        | 3708596 | SPIRONOLACTONE | C03DA01 |
| SPIRONOLACTONE ARL 50 MG CPR 90                       | 3696491 | SPIRONOLACTONE | C03DA01 |
| SPIRONOLACTONE ARL 50 MG CPR 30                       | 3696485 | SPIRONOLACTONE | C03DA01 |
| SPIRONOLACTONE ARL 75 MG CPR 90                       | 3601444 | SPIRONOLACTONE | C03DA01 |
| SPIRONOLACTONE CRT 50MG CPR 30                        | 3603383 | SPIRONOLACTONE | C03DA01 |
| SPIRONOLACTONE CRISTERS 50 MG 1 BOITE DE 90, COMPOSEE | 3603418 | SPIRONOLACTONE | C03DA01 |
| SPIRONOLACTONE RTP 25MG CPR 90                        | 3967808 | SPIRONOLACTONE | C03DA01 |
| SPIRONOLACTONE ZYDUS 50 MG 1 BOITE DE 90, COMPOSEE    | 3737204 | SPIRONOLACTONE | C03DA01 |
| SPIRONOLACTONE SDZ 25MG CPR 90                        | 3961680 | SPIRONOLACTONE | C03DA01 |
| SPIRONOLACTONE SDZ 25MG CPR 30                        | 3961674 | SPIRONOLACTONE | C03DA01 |
| SPIRONOLACTONE CRT 25MG CPR 30                        | 3961473 | SPIRONOLACTONE | C03DA01 |
| SPIRONOLACTONE PFZ 25MG CPR 30                        | 3485050 | SPIRONOLACTONE | C03DA01 |
| SPIRONOLACTONE ZEN 25MG CPR 30                        | 3967949 | SPIRONOLACTONE | C03DA01 |
| SPIRONOLACTONE ARW 25MG CPR 90                        | 3968216 | SPIRONOLACTONE | C03DA01 |
| SPIRONOLACTONE ARW 25MG CPR 30                        | 3968191 | SPIRONOLACTONE | C03DA01 |
| SPIRONOLACTONE VIATRIS 25MG CPR 30                    | 3974240 | SPIRONOLACTONE | C03DA01 |
| SPIRONOLACTONE EG 25MG CPR 30                         | 3961510 | SPIRONOLACTONE | C03DA01 |
| SPIRONOLACTONE BGA 25MG CPR 30                        | 3485073 | SPIRONOLACTONE | C03DA01 |
| SPIRONOLACTONE TVC 25MG CPR 90                        | 3959890 | SPIRONOLACTONE | C03DA01 |
| SPIRONOLACTONE CRT 75MG CPR 30                        | 3709182 | SPIRONOLACTONE | C03DA01 |
| SPIRONOLACTONE ZYDUS 25 MG 1 BOITE DE 90, COMPOSEE    | 3737201 | SPIRONOLACTONE | C03DA01 |

---

|                                       |         |                |         |
|---------------------------------------|---------|----------------|---------|
| SPIRONOLACTONE ARW 50MG CPR 90        | 3736457 | SPIRONOLACTONE | C03DA01 |
| SPIRONOLACTONE ARL 75 MG CPR 30       | 3601438 | SPIRONOLACTONE | C03DA01 |
| SPIRONOLACTONE PFZ 25MG CPR 90        | 3962797 | SPIRONOLACTONE | C03DA01 |
| SPIRONOLACTONE ZYD 75MG CPR 30        | 3709124 | SPIRONOLACTONE | C03DA01 |
| SPIRONOLACTONE TVC 25MG CPR 30        | 3959884 | SPIRONOLACTONE | C03DA01 |
| SPIRONOLACTONE ARW 75MG CPR 90        | 3739705 | SPIRONOLACTONE | C03DA01 |
| SPIRONOLACTONE VIATRIS 25MG CPR 30    | 3021159 | SPIRONOLACTONE | C03DA01 |
| SPIRONOLACTONE BGA 25MG CPR 30        | 3013649 | SPIRONOLACTONE | C03DA01 |
| SPIRONOLACTONE ZEN 50MG CPR 90        | 3787495 | SPIRONOLACTONE | C03DA01 |
| SPIRONOLACTONE BGA 50 MG CPR 30       | 3013650 | SPIRONOLACTONE | C03DA01 |
| SPIRONOLACTONE ZEN 75MG CPR 90        | 3787503 | SPIRONOLACTONE | C03DA01 |
| SPIRONOLACTONE ZEN 25MG CPR 90        | 3967955 | SPIRONOLACTONE | C03DA01 |
| ALDACTONE 75MG CPR 20                 | 3260799 | SPIRONOLACTONE | C03DA01 |
| ALDACTONE 50MG CPR 20                 | 3272503 | SPIRONOLACTONE | C03DA01 |
| PRACTON 50MG CPR GE 20                | 3237671 | SPIRONOLACTONE | C03DA01 |
| SPIRONOLACTONE RATIOPHARM 50MG CPR 20 | 3262574 | SPIRONOLACTONE | C03DA01 |
| SPIROCTAN MICRONISE 50MG GELULE 20    | 3245618 | SPIRONOLACTONE | C03DA01 |
| SPIROCTAN MICRONISE 75MG GELULE 20    | 3265124 | SPIRONOLACTONE | C03DA01 |
| SPIRONOLACTONE EG 50MG CPR 20         | 3403170 | SPIRONOLACTONE | C03DA01 |
| SPIRONOLACTONE GNR 75MG CPR 30        | 3496786 | SPIRONOLACTONE | C03DA01 |
| SPIROPHAR 50MG CPR Gé 20              | 3403193 | SPIRONOLACTONE | C03DA01 |
| SPIRONOLACTONE BAYER 75MG CPR 30      | 3467336 | SPIRONOLACTONE | C03DA01 |
| FLUMACH 75MG CPR 30                   | 3360288 | SPIRONOLACTONE | C03DA01 |
| SPIRONOLACTONE GNR 75MG CPR 20        | 3432042 | SPIRONOLACTONE | C03DA01 |
| SPIRONOLACTONE PFZ 50MG CPR 30        | 3467052 | SPIRONOLACTONE | C03DA01 |
| ALDACTONE 25MG CPR 30                 | 3446630 | SPIRONOLACTONE | C03DA01 |
| SPIRONOLACTONE EG 50MG CPR 30         | 3506059 | SPIRONOLACTONE | C03DA01 |
| SPIRONOLACTONE TVC 50MG CPR 30        | 3611626 | SPIRONOLACTONE | C03DA01 |
| SPIRONOLACTONE EG 75MG CPR 30         | 3526843 | SPIRONOLACTONE | C03DA01 |
| SPIRONOLACTONE RPG 75MG CPR 20        | 3401455 | SPIRONOLACTONE | C03DA01 |
| SPIRONOLACTONE GNR 50MG CPR 30        | 3567517 | SPIRONOLACTONE | C03DA01 |
| SPIROPHAR 75MG CPR Gé 20              | 3403201 | SPIRONOLACTONE | C03DA01 |
| SPIRONOLACTONE PFZ 75MG CPR 30        | 3431806 | SPIRONOLACTONE | C03DA01 |
| PRACTON 75 MG Gé CPR 20               | 3403187 | SPIRONOLACTONE | C03DA01 |
| SPIRONOLACTONE MSD 50MG CPR 20        | 3392012 | SPIRONOLACTONE | C03DA01 |
| FLUMACH 50MG CPR 30                   | 3359635 | SPIRONOLACTONE | C03DA01 |
| ALDACTONE 50MG CPR 30                 | 3512539 | SPIRONOLACTONE | C03DA01 |
| SPIRONOLACTONE TVC 75MG CPR 30        | 3611632 | SPIRONOLACTONE | C03DA01 |
| SPIROCTAN 75MG GELULE 30              | 3522408 | SPIRONOLACTONE | C03DA01 |
| SPIROCTAN 50MG GELULE 30              | 3522383 | SPIRONOLACTONE | C03DA01 |
| SPIRONOLACTONE IVAX 75MG CPR 30       | 3604046 | SPIRONOLACTONE | C03DA01 |
| SPIROPHAR 75MG CPR Gé 30              | 3496941 | SPIRONOLACTONE | C03DA01 |
| SPIROPHAR 50MG CPR Gé 30              | 3496935 | SPIRONOLACTONE | C03DA01 |
| SPIRONOLACTONE BIOGARAN 75MG CPR 20   | 3479262 | SPIRONOLACTONE | C03DA01 |
| SPIRONOLACTONE BIOGARAN 50MG CPR 20   | 3479256 | SPIRONOLACTONE | C03DA01 |
| SPIRONOLACTONE VIATRIS 75MG CPR 30    | 3496817 | SPIRONOLACTONE | C03DA01 |

---

|                                                      |         |                |         |
|------------------------------------------------------|---------|----------------|---------|
| SPIRONOLACTONE BGA 75 MG CPR 30                      | 3484748 | SPIRONOLACTONE | C03DA01 |
| SPIRONOLACTONE IREX 50MG CPR 30                      | 3570749 | SPIRONOLACTONE | C03DA01 |
| SPIRONOLACTONE MYLAN 75MG CPR 20                     | 3430959 | SPIRONOLACTONE | C03DA01 |
| SPIRONOLACTONE MSD 50MG CPR 30                       | 3409787 | SPIRONOLACTONE | C03DA01 |
| SPIRONOLACTONE RTP 75MG CPR 30                       | 3484961 | SPIRONOLACTONE | C03DA01 |
| SPIRONOLACTONE GNR 50MG CAPSULE 20                   | 3248982 | SPIRONOLACTONE | C03DA01 |
| SPIRONOLACTONE MSD 75MG CPR 20                       | 3392029 | SPIRONOLACTONE | C03DA01 |
| SPIRONOLACTONE G GAM 75 MG 1 BOITE DE 30, COMBIBRAME | 3488885 | SPIRONOLACTONE | C03DA01 |
| SPIRONOLACTONE BGA 50 MG CPR 30                      | 3496591 | SPIRONOLACTONE | C03DA01 |
| SPIRONOLACTONE GNR 50MG CAPSULE 30                   | 3248999 | SPIRONOLACTONE | C03DA01 |
| SPIRONOLACTONE RTP 50MG CPR 30                       | 3506065 | SPIRONOLACTONE | C03DA01 |
| SPIRONONE 75 MG (SPIRONOLACTONE MICROFINE) 30x0,4    | 3506048 | SPIRONOLACTONE | C03DA01 |
| SPIRONOLACTONE RPG 50MG CPR 30                       | 3506013 | SPIRONOLACTONE | C03DA01 |
| SPIRONOLACTONE BAYER 50MG CPR 30                     | 3467307 | SPIRONOLACTONE | C03DA01 |
| SPIRONOLACTONE IREX 75MG CPR 30                      | 3570726 | SPIRONOLACTONE | C03DA01 |
| SPIRONOLACTONE IVAX 50MG CPR 30                      | 3604052 | SPIRONOLACTONE | C03DA01 |
| SPIRONOLACTONE RPG 75MG CPR 30                       | 3496958 | SPIRONOLACTONE | C03DA01 |
| ALDACTONE 75MG CPR 30                                | 3512545 | SPIRONOLACTONE | C03DA01 |
| SPIRONOLACTONE ARW 75MG CPR 30                       | 3605784 | SPIRONOLACTONE | C03DA01 |
| SPIRONOLACTONE MSD 75MG CPR 30                       | 3409770 | SPIRONOLACTONE | C03DA01 |
| SPIRONONE 75MG CPR G  20                             | 3260836 | SPIRONOLACTONE | C03DA01 |
| SPIRONOLACTONE RPG 50MG CPR 20                       | 3401449 | SPIRONOLACTONE | C03DA01 |

Abbreviations: ATC, WHO Anatomical, Therapeutic, and Chemical classification; CIP, *Code Identifiant de Pr sentation* (code describing the presentation and packaging of a medicine)

**Table E. WHO classification of intracranial meningiomas**

| WHO grade                   | Title                  | Morphological codes | ICD-10 codes used in this study to identify grades |
|-----------------------------|------------------------|---------------------|----------------------------------------------------|
| <b>Grade I - Benign</b>     | Meningothelial         | 9530/0              | D32                                                |
|                             | Fibrous (fibroblastic) | 9531/0              |                                                    |
|                             | Transitional (mixed)   | 9532/0              |                                                    |
|                             | Psammomatous           | 9537/0              |                                                    |
|                             | Angiomatous            | 9533/0              |                                                    |
|                             | Microcystic            | 9534/0              |                                                    |
|                             | Secretory              | 9530/0              |                                                    |
| <b>Grade II - Atypical</b>  | Lymphoplasmacyte-rich  | 9530/0              | D42                                                |
|                             | Choroid                | 9538/1              |                                                    |
|                             | Clear cell             | 9538/1              |                                                    |
| <b>Grade II - Malignant</b> | Atypical               | 9539/1              | C70                                                |
|                             | Papillary              | 9538/3              |                                                    |
|                             | Rhabdoid               | 9538/3              |                                                    |
|                             | Anaplastic             | 9530/3              |                                                    |

Abbreviations: ICD-10, 10th version of the International Classification of Diseases

**Table F. CIM-10 and CCAM codes used to identify radiotherapy procedures**

ICD-10 codes were sought for the main or linked diagnoses in the PMSI Medicine-Surgery-Obstetrics data.

CCAM codes were sought in the PMSI and reimbursement data. It should be noted that radiotherapy does not lie within the scope of the PMSI, but the information concerning this treatment is entered into the SNDS via the reimbursement data.

| ICD-10 code | ICD-10 label                        |
|-------------|-------------------------------------|
| Z510        | Radiotherapy session                |
| Z5100       | Preparation session for irradiation |
| Z5101       | Irradiation session                 |

*Codes after May 2020:*

| CCAM code | CCAM label                                                                                                                                                                                                                                                                                                                |
|-----------|---------------------------------------------------------------------------------------------------------------------------------------------------------------------------------------------------------------------------------------------------------------------------------------------------------------------------|
| ZZMK014   | Preparation for external irradiation without dosimetry, with simulation under the treatment device                                                                                                                                                                                                                        |
| ZZMK002   | Preparation for external irradiation without dosimetry, with simulation using a simulator, a simulator-scanner, or a scanner with integrated simulator function                                                                                                                                                           |
| ZZMK013   | Preparation for external irradiation without dosimetry, with simulation using a simulator, a simulator-scanograph, or scanner with integrated simulator function and custom manufacture of a personalized mask and/or configuration of a multi-blade collimator                                                           |
| ZZMK026   | Preparation for external irradiation with localization by simulator-scanograph, two-dimensional dosimetry, and simulation with a simulator-scanograph                                                                                                                                                                     |
| ZZMK028   | Preparation for external irradiation with localization by simulator-scanograph, two-dimensional dosimetry, simulation with a simulator-scanograph, and custom manufacture of a personalized mask and/or configuration of a multi-blade collimator                                                                         |
| ZZMK001   | Preparation for external irradiation with scanner tracking, two-dimensional dosimetry, and simulation with a simulator or scanner with integrated simulator function                                                                                                                                                      |
| ZZMK017   | Preparation for external irradiation with localization by scanner, two-dimensional dosimetry, simulation with a simulator or scanner with integrated simulator function, and custom manufacture of a personalized mask and/or configuration of a multi-blade collimator                                                   |
| ZZMK016   | Preparation for external irradiation with localization by scanner, three-dimensional dosimetry without HDV, simulation with a simulator or scanner with integrated simulator function, and custom manufacture of a personalized mask and/or configuration of a multi-blade collimator                                     |
| ZZMK011   | Preparation for external irradiation with localization by scanner, three-dimensional dosimetry without HDV, virtual simulation with the "source view" function [beam eye view] [BEV] and three-dimensional restitution, and custom manufacture of a personalized mask and/or parameterization of a multi-blade collimator |
| ZZMK018   | Preparation for external irradiation with scanner tracking, three-dimensional dosimetry with HDV, virtual simulation with beam eye view [BEV] and three-dimensional rendering, and custom manufacture of a compensating filter or personalized mask and/or configuration of a multi-leaf collimator                       |
| ZZMK024   | Preparation for external irradiation with localization by scanner, three-dimensional dosimetry with HDV, virtual simulation with the "source view" function [beam eye view] [BEV] and three-dimensional restitution, and configuration of a multi-blade collimator for intensity modulation                               |
| ZZMP001   | Preparation for whole-body irradiation                                                                                                                                                                                                                                                                                    |
| QZMP003   | Preparation for total skin irradiation                                                                                                                                                                                                                                                                                    |
| AGMP001   | Preparation for external nerve irradiation [craniospinal irradiation]                                                                                                                                                                                                                                                     |
| ZZMP018   | Preparation for intracavitary contact radiotherapy                                                                                                                                                                                                                                                                        |
| ZZMP012   | Preparation for intracranial irradiation under stereotactic conditions in a single dose, with placement of an invasive frame                                                                                                                                                                                              |
| ZZMP016   | Preparation for external irradiation under stereotactic conditions without synchronization, with respiration, with three-dimensional dosimetry with HDV after tracking by multimodal digital fusion and virtual simulation with the "source view" function [beam eye view] [BEV] and three-dimensional restitution        |
| ZZMP013   | Preparation for external irradiation under stereotactic conditions with synchronization, with respiration, with three-dimensional dosimetry with HDV after tracking by multimodal digital fusion and virtual simulation with the "source view" function [beam eye view] [BEV] and three-dimensional restitution           |
| ZZMK019   | Resumption of preparation for external irradiation without dosimetry, with simulation under the treatment device                                                                                                                                                                                                          |
| ZZMK027   | Resumption of preparation for external irradiation, two-dimensional dosimetry, simulation with a simulator, a simulator-scanner or a scanner with an integrated simulator function, and custom manufacture of a personalized mask and/or configuration of a multi-blade collimator                                        |

|         |                                                                                                                                                                                                                                                                                                                                                                |
|---------|----------------------------------------------------------------------------------------------------------------------------------------------------------------------------------------------------------------------------------------------------------------------------------------------------------------------------------------------------------------|
| ZZMK022 | Resumption of preparation for external irradiation with localization by scanner, three-dimensional dosimetry without HDV, simulation with a simulator or a scanner with integrated simulator function, and custom manufacture of a personalized mask and/or configuration of a multi-blade collimator                                                          |
| ZZMK020 | Resumption of preparation for external irradiation with scanner tracking, three-dimensional dosimetry with HDV, virtual simulation with the "source view" function [beam eye view] [BEV] and three-dimensional restitution, and custom manufacture of a personalized compensating filter or personalized mask and/or configuration of a multi-blade collimator |
| ZZMK025 | Resumption of preparation for external irradiation with localization by scanner, three-dimensional dosimetry with HDV, virtual simulation with the function "source view" [beam eye view] [BEV] and three-dimensional restitution, and configuration of a multi-blade collimator for intensity modulation                                                      |

*Codes before May 2010:*

| <b>CCAM code</b> | <b>CCAM label</b>                                                                                                                                                                                                                                                                                                                                            |
|------------------|--------------------------------------------------------------------------------------------------------------------------------------------------------------------------------------------------------------------------------------------------------------------------------------------------------------------------------------------------------------|
| ZZMK014          | Preparation for external irradiation without dosimetry, with simulation under the treatment device                                                                                                                                                                                                                                                           |
| ZZMK002          | Preparation for external irradiation without dosimetry, with simulation with a simulator, a simulator-scanner, or a scanner with integrated simulator function                                                                                                                                                                                               |
| ZZMK013          | Preparation for external irradiation without dosimetry, with simulation with a simulator, a simulator-scanograph, or a scanner with integrated simulator function and custom manufacture of a personalized mask and/or configuration of a multi-blade collimator                                                                                             |
| ZZMK006          | Preparation for external irradiation with identification by conformer, two-dimensional dosimetry on 1 or 2 slices, and simulation with a simulator, simulator-scanner, or scanner with integrated simulator function                                                                                                                                         |
| ZZMK012          | Preparation for external irradiation with identification by conformer, two-dimensional dosimetry on 1 or 2 slices, simulation with a simulator, simulator-scanograph, or scanner with integrated simulator function, and custom manufacture of a personalized mask and /or configuration of a multi-blade collimator                                         |
| ZZMK010          | Preparation for external irradiation with identification by conformer, two-dimensional dosimetry on 3 or more slices and simulation with a simulator, simulator-scanner, or scanner with integrated simulator function                                                                                                                                       |
| ZZMK004          | Preparation for external irradiation with identification by conformer, two-dimensional dosimetry on 3 or more slices, simulation with a simulator, simulator-scanograph, or scanner with integrated simulator function, and custom manufacture of a personalized mask and/or configuration of a multi-blade collimator                                       |
| ZZMK015          | Preparation for external irradiation with tracking by conformer and analysis of data acquired by ultrasound, two-dimensional dosimetry on 3 or more slices, and simulation with a simulator, simulator-scanograph, or scanner with integrated simulator function                                                                                             |
| ZZMK005          | Preparation for external irradiation with tracking by conformer and analysis of data acquired by ultrasound, two-dimensional dosimetry on 3 or more slices, simulation with a simulator, simulator-scanograph, or scanner with integrated simulator function, and custom manufacture of a personalized mask and/or configuration of a multi-blade collimator |
| ZZMK003          | Preparation for external irradiation with identification by simulator-scanograph, two-dimensional dosimetry on 3 or more slices, and simulation with a simulator-scanograph                                                                                                                                                                                  |
| ZZMK007          | Preparation for external irradiation with identification by simulator-scanograph, two-dimensional dosimetry on 3 or more slices, simulation with a simulator-scanograph, and custom manufacture of a personalized mask and/or configuration of a multi-blade collimator                                                                                      |
| ZZMK001          | Preparation for external irradiation with localization by scanner, two-dimensional dosimetry on 3 or more slices, and simulation with a simulator or a scanner with integrated simulator function                                                                                                                                                            |
| ZZMK017          | Preparation for external irradiation with localization by scanner, two-dimensional dosimetry on 3 or more slices, simulation with a simulator or a scanner with integrated simulator function, and custom manufacture of a personalized mask and/or configuration of a multi-blade collimator                                                                |
| ZZMK016          | Preparation for external irradiation with localization by scanner, three-dimensional dosimetry without HDV, simulation with a simulator or a scanner with integrated simulator function, and custom manufacture of a personalized mask and/or configuration of a multi-blade collimator                                                                      |
| ZZMK011          | Preparation for external irradiation with localization by scanner, three-dimensional dosimetry without HDV, virtual simulation with the "source view" function [beam eye view] [BEV] and three-dimensional restitution, and custom manufacture of a personalized mask and/or configuration of a multi-blade collimator                                       |
| ZZMP008          | Preparation for external irradiation with three-dimensional dosimetry without HDV after localization by renography [MRI], virtual simulation with the "source view" function [beam eye view] [BEV] and three-dimensional restitution, and custom manufacture of a personalized mask and/or or configuration of a multi-blade collimator                      |
| ZZMK018          | Preparation for external irradiation with scanner tracking, three-dimensional dosimetry with HDV, virtual simulation with beam eye view [BEV] and three-dimensional rendering, and custom manufacture of a compensating filter or personalized mask and/or configuration of a multi-blade collimator                                                         |

---

|         |                                                                                                                                                                                                                                                                                                                                                                                    |
|---------|------------------------------------------------------------------------------------------------------------------------------------------------------------------------------------------------------------------------------------------------------------------------------------------------------------------------------------------------------------------------------------|
| ZZMK900 | Preparation for external irradiation with localization by scanner, three-dimensional dosimetry with HDV, virtual simulation with the "source view" [beam eye view] [BEV] function and three-dimensional restitution, and configuration of a multi-blade collimator for dynamic use                                                                                                 |
| ZZMP010 | Preparation for external irradiation with three-dimensional dosimetry with HDV after localization by renography [MRI], virtual simulation using the "source view" function [beam's eye view] [BEV] and three-dimensional restitution, and manufacture of a personalized compensating filter or personalized custom mask and/or configuration of multi-blade collimator             |
| ZZMP900 | Preparation for external irradiation with three-dimensional dosimetry with HDV after localization by renography [MRI], virtual simulation with the "source view" function [beam eye view] [BEV] and three-dimensional restitution, and configuration of a multi-blade collimator for dynamic use                                                                                   |
| ZZMP001 | Preparing for whole-body irradiation                                                                                                                                                                                                                                                                                                                                               |
| ZZMP012 | Preparation for brain irradiation under single-dose stereotactic conditions                                                                                                                                                                                                                                                                                                        |
| ZZMP011 | Preparation for brain irradiation under stereotactic conditions with a fractionated-dose                                                                                                                                                                                                                                                                                           |
| QZMP003 | Preparation for fractionated-dose total skin irradiation                                                                                                                                                                                                                                                                                                                           |
| AZMP001 | Preparation for external nerve irradiation [craniospinal irradiation]                                                                                                                                                                                                                                                                                                              |
| ZZMK019 | Resumption of preparation for external irradiation without dosimetry, with simulation under the treatment device                                                                                                                                                                                                                                                                   |
| ZZMK021 | Resumption of preparation for external irradiation with identification by conformer, two-dimensional dosimetry on 1 or 2 slices, simulation with a simulator, simulator-scanograph, or scanner with integrated simulator function, and custom manufacture of a personalized mask and/or parametrization of a multi-blade collimator                                                |
| ZZMK023 | Resumption of preparation for external irradiation with identification by conformer and analysis of data acquired by ultrasound, two-dimensional dosimetry on 3 or more slices, simulation with a simulator, simulator-scanograph, or a scanner with integrated simulator function, and custom manufacture of a personalized mask and/or configuration of a multi-blade collimator |
| ZZMK022 | Resumption of preparation for external irradiation with localization by scanner, three-dimensional dosimetry without HDV, simulation with a simulator or a scanner with integrated simulator function, and custom manufacture of a personalized mask and/or configuration of a multi-blade collimator                                                                              |
| ZZMK020 | Resumption of preparation for external irradiation with scanner tracking, three-dimensional dosimetry with HDV, virtual simulation with the "source view" function [beam eye view] [BEV] and three-dimensional restitution, and custom manufacture of a personalized compensating filter or personalized mask and/or configuration of a multi-blade collimator                     |

---

Abbreviations: CCAM, *Classification Commune des Actes Médicaux* (common classification for medical acts); ICD-10, 10th version of the International Classification of Diseases; PMSI, *Programme de Médicalisation des Systèmes d'Information* (information systems medicalisation program); SNDS, *Système National des Données de Santé* (French national healthcare database)



**Table G. List of ATC codes used to identify antiepileptic drugs**

| <b>ATC code</b> | <b>ATC class</b>             |
|-----------------|------------------------------|
| N03AA           | BARBITURATES AND DERIVATIVES |
| N03AA02         | PHENOBARBITAL                |
| N03AA03         | PRIMIDONE                    |
| N03AB02         | PHENYTOIN                    |
| N03AD01         | ETHOSUXIMIDE                 |
| N03AE01         | CLONAZEPAM                   |
| N03AF01         | CARBAMAZEPINE                |
| N03AF02         | OXCARBAZEPINE                |
| N03AF03         | RUFINAMIDE                   |
| N03AF04         | ESLICARBAZEPINE              |
| N03AG01         | VALPROIC ACID                |
| N03AG02         | VALPROMIDE                   |
| N03AG04         | VIGABATRIN                   |
| N03AG05         | PROGABIDE                    |
| N03AG06         | TIAGABINE                    |
| N03AX09         | LAMOTRIGINE                  |
| N03AX11         | TOPIRAMATE                   |
| N03AX12         | GABAPENTIN                   |
| N03AX14         | LEVETIRACETAM                |
| N03AX15         | ZONISAMIDE                   |
| N03AX17         | STIRIPENTOL                  |
| N03AX18         | LACOSAMIDE                   |
| N03AX21         | RETIGABINE                   |
| N03AX22         | PERAMPANEL                   |
| N03AX23         | BRIVARACETAM                 |
| N03AX24         | CANNABIDIOL                  |
| N02BF01         | GABAPENTIN                   |
| N02BF02         | PREGABALINE                  |
| N05CD08         | MIDAZOLAM                    |
| N05BA01         | DIAZEPAM                     |

Abbreviations: ATC, WHO Anatomical, Therapeutic, and Chemical classification

**Table H. List of LPP codes for copper intrauterine devices**

| <b>LPP label</b>                                                             | <b>LPP code</b> |
|------------------------------------------------------------------------------|-----------------|
| CONTRACEPTIVE OBJECT, COPPER IUD WITH INSERTER.                              | 1158536         |
| CONTRACEPTIVE OBJECT, COPPER IUD WITH INSERTER, LABO 7 MED                   | 6186566         |
| CONTRACEPTIVE OBJECT, COPPER IUD WITH INSERTER, LABO GYNEAS                  | 6186572         |
| CONTRACEPTIVE OBJECT, COPPER IUD WITH INSERTER, HRA PHARMA                   | 6172819         |
| CONTRACEPTIVE OBJECT, COPPER IUD WITH INSERTER, LABORATOIRE CCD              | 6184840         |
| CONTRACEPTIVE OBJECT, COPPER IUD WITH INSERTER, EUROMEDIAL                   | 1135890         |
| CONTRACEPTIVE OBJECT, COPPER IUD WITH INSERTER, CEMAG CARE                   | 1173062         |
| CONTRACEPTIVE OBJECT, IUD WITH INSERTER, CONTREL, GYNEFIX                    | 1187615         |
| CONTRACEPTIVE OBJECT, IUD WITH INSERTER, MONA LISA NV, MONA LISA CUT-380A    | 1106752         |
| CONTRACEPTIVE OBJECT, IUD WITH INSERTER, MONA LISA NV, MONA LISA CU375-RO    | 1121125         |
| CONTRACEPTIVE OBJECT, IUD WITH INSERTER, MONA LISA NV, MONA LISA CU375 SL RO | 1171407         |
| CONTRACEPTIVE OBJECT, IUD WITH INSERTER, MONA LISA NV, MONA LISA NT CU380    | 1132519         |
| CONTRACEPTIVE OBJECT, IUD WITH INSERTER, MULTILAN, CU 250 STANDARD           | 1111760         |
| CONTRACEPTIVE OBJECT, IUD WITH INSERTER, MULTILAN, CU 250 SHORT              | 1167363         |
| CONTRACEPTIVE OBJECT, IUD WITH INSERTER, MULTILAN, CU 375 STANDARD           | 1152960         |
| CONTRACEPTIVE OBJECT, IUD WITH INSERTER, MULTILAN, CU 375 SL                 | 1101938         |
| CONTRACEPTIVE OBJECT, IUD WITH INSERTER, PRODIMED, GYNELLE 375               | 1134760         |
| CONTRACEPTIVE OBJECT, IUD WITH INSERTER, 7 MED, UT N 380 STANDARD            | 1128370         |
| CONTRACEPTIVE OBJECT, IUD WITH INSERTER, 7 MED, UT S 380 SHORT               | 1122283         |
| CONTRACEPTIVE OBJECT, IUD WITH INSERTER, 7 MED, TT 380                       | 1103848         |
| CONTRACEPTIVE OBJECT, IUD WITH INSERTER, 7 MED, NT 380, SHORT OU STANDARD    | 1120717         |
| CONTRACEPTIVE OBJECT, IUD WITH INSERTER, SHERING SA, NOVA T                  | 1132531         |
| CONTRACEPTIVE OBJECT, IUD WITH INSERTER, SHERING SA, NOVA T 380              | 1146770         |
| CONTRACEPTIVE OBJECT, IUD WITH INSERTER, THERAMEX, SERTALIA                  | 1125749         |

Abbreviations: LPP, *Liste des Produits et Prestations* (list of products and services)

**Table I. Description of cases and controls for the analyses of 52 mg levonorgestrel and copper intrauterine devices (inclusion period restricted to 2011-2018)**

| Characteristics                       | Cases<br><i>N</i> = 15,162<br><i>n</i> (%) | Controls<br><i>N</i> = 75,810<br><i>n</i> (%) |
|---------------------------------------|--------------------------------------------|-----------------------------------------------|
| <b>Age (years) at inclusion</b>       |                                            |                                               |
| Mean age [standard deviation]         | 57.8 [12.9]                                | 57.8 [12.9]                                   |
| ≤ 19                                  | 44 (0.3%)                                  | 220 (0.3%)                                    |
| 20-34                                 | 440 (2.9%)                                 | 2,200 (2.9%)                                  |
| 35-44                                 | 1,801 (11.9%)                              | 9,005 (11.9%)                                 |
| 45-54                                 | 4,042 (26.7%)                              | 20,210 (26.7%)                                |
| 55-64                                 | 3,904 (25.7%)                              | 19,520 (25.7%)                                |
| 65-74                                 | 3,341 (22.0%)                              | 16,705 (22.0%)                                |
| 75-84                                 | 1,434 (9.5%)                               | 7,170 (9.5%)                                  |
| ≥ 85                                  | 156 (1.0%)                                 | 780 (1.0%)                                    |
| <b>Region of residence*</b>           |                                            |                                               |
| Paris Ile-de-France                   | 2,676 (17.6%)                              | 13,380 (17.6%)                                |
| North East                            | 2,900 (19.1%)                              | 14,500 (19.1%)                                |
| North West                            | 3,009 (19.8%)                              | 15,045 (19.8%)                                |
| South East                            | 3,409 (22.5%)                              | 17,045 (22.5%)                                |
| South West                            | 2,886 (19.0%)                              | 14,430 (19.0%)                                |
| DOM                                   | 282 (1.9%)                                 | 1,410 (1.9%)                                  |
| <b>Year of surgery for meningioma</b> |                                            |                                               |
| 2011                                  | 1,711 (11.3%)                              | N/A                                           |
| 2012                                  | 1,774 (11.7%)                              | N/A                                           |
| 2013                                  | 1,783 (11.8%)                              | N/A                                           |
| 2014                                  | 1,910 (12.6%)                              | N/A                                           |
| 2015                                  | 1,928 (12.7%)                              | N/A                                           |
| 2016                                  | 2,008 (13.2%)                              | N/A                                           |
| 2017                                  | 1,979 (13.1%)                              | N/A                                           |
| 2018                                  | 2,069 (13.6%)                              | N/A                                           |
| <b>Location of the meningioma †</b>   |                                            |                                               |
| Anterior base of the skull            | 3,356 (22.1%)                              | N/A                                           |
| Mid-base of the skull                 | 3,266 (21.5%)                              | N/A                                           |
| Posterior base of the skull           | 1,792 (11.8%)                              | N/A                                           |
| Convexity                             | 5,458 (36.0%)                              | N/A                                           |
| Falx cerebri and tentorium cerebelli  | 1,635 (10.8%)                              | N/A                                           |
| Other                                 | 221 (1.5%)                                 | N/A                                           |
| <b>Grade of the meningioma</b>        |                                            |                                               |
| Benign                                | 14,029 (92.5%)                             | N/A                                           |
| Atypical                              | 823 (5.4%)                                 | N/A                                           |
| Malignant                             | 310 (2.0%)                                 | N/A                                           |
| <b>Adjuvant radiotherapy</b>          |                                            |                                               |
| All grades                            | 716 (4.7%)                                 | N/A                                           |
| Benign                                | 584 (4.2%)                                 | N/A                                           |
| Atypical                              | 51 (6.2%)                                  | N/A                                           |

|                                                 |               |              |
|-------------------------------------------------|---------------|--------------|
| Malignant                                       | 81 (26.1%)    | N/A          |
| <b>Use of antiepileptic drugs 3 years later</b> |               |              |
| All grades                                      | 4,279 (28.2%) | 4,482 (5.9%) |
| Benign                                          | 3,905 (27.8%) | N/A          |
| Atypical                                        | 255 (31.0%)   | N/A          |
| Malignant                                       | 119 (38.4%)   | N/A          |
| <b>2-year mortality</b>                         |               |              |
| All grades                                      | 486 (3.2%)    | 964 (1.3%)   |
| Benign                                          | 406 (2.9%)    | N/A          |
| Atypical                                        | 38 (4.6%)     | N/A          |
| Malignant                                       | 42 (13.5%)    | N/A          |
| <b>5-year mortality ‡</b>                       |               |              |
| All grades                                      | 862 (6.6%)    | 2,295 (3.5%) |
| Benign                                          | 729 (6.0%)    | N/A          |
| Atypical                                        | 65 (9.5%)     | N/A          |
| Malignant                                       | 68 (25.2%)    | N/A          |

Abbreviations: DOM, *département d'outre-mer* (overseas *département*); N/A, not applicable

\*North East: Grand-Est, Bourgogne Franche-Comté, Hauts-de-France. Paris Ile-de-France: city of Paris and Ile-de-France. North West: Bretagne, Centre Val de Loire, Normandie, Pays de la Loire. South East: Auvergne-Rhône-Alpes, Provence-Alpes-Côte d'Azur, Corse. South East: Nouvelle-Aquitaine, Occitanie. DOM: Guadeloupe, Martinique, Guyane, la Réunion

†Tumours may occur at multiple sites in the same individual

‡ Restricted inclusion period: 2008-2017

**Table J. Description of cases and controls for analyses of levonorgestrel 13.5 mg intrauterine devices (inclusion period restricted to 2017-2018)**

| Characteristics                                 | Cases<br><i>N</i> = 4,048<br><i>n</i> (%) | Controls<br><i>N</i> = 20,240<br><i>n</i> (%) |
|-------------------------------------------------|-------------------------------------------|-----------------------------------------------|
| <b>Age (years) at inclusion</b>                 |                                           |                                               |
| Mean age [standard deviation]                   | 58.4 [13.1]                               | 58.4 [13.1]                                   |
| ≤ 19                                            | 14 (0.3%)                                 | 70 (0.3%)                                     |
| 20-34                                           | 105 (2.6%)                                | 525 (2.6%)                                    |
| 35-44                                           | 459 (11.3%)                               | 2,295 (11.3%)                                 |
| 45-54                                           | 1,040 (25.7%)                             | 5,200 (25.7%)                                 |
| 55-64                                           | 1,000 (24.7%)                             | 5,000 (24.7%)                                 |
| 65-74                                           | 976 (24.1%)                               | 4,880 (24.1%)                                 |
| 75-84                                           | 407 (10.1%)                               | 2,035 (10.1%)                                 |
| ≥ 85                                            | 47 (1.2%)                                 | 235 (1.2%)                                    |
| <b>Region of residence*</b>                     |                                           |                                               |
| Paris Ile-de-France                             | 705 (17.4%)                               | 3,525 (17.4%)                                 |
| North East                                      | 797 (19.7%)                               | 3,985 (19.7%)                                 |
| North West                                      | 819 (20.2%)                               | 4,095 (20.2%)                                 |
| South East                                      | 887 (21.9%)                               | 4,435 (21.9%)                                 |
| South West                                      | 752 (18.6%)                               | 3,760 (18.6%)                                 |
| DOM                                             | 88 (2.2%)                                 | 440 (2.2%)                                    |
| <b>Year of surgery for meningioma</b>           |                                           |                                               |
| 2017                                            | 1,979 (48.9%)                             | N/A                                           |
| 2018                                            | 2,069 (51.1%)                             | N/A                                           |
| <b>Location of the meningioma<sup>†</sup></b>   |                                           |                                               |
| Anterior base of the skull                      | 948 (23.4%)                               | N/A                                           |
| Mid-base of the skull                           | 851 (21.0%)                               | N/A                                           |
| Posterior base of the skull                     | 503 (12.4%)                               | N/A                                           |
| Convexity                                       | 1,436 (35.5%)                             | N/A                                           |
| Falx cerebri and tentorium cerebelli            | 413 (10.2%)                               | N/A                                           |
| Other                                           | 46 (1.1%)                                 | N/A                                           |
| <b>Grade of the meningioma</b>                  |                                           |                                               |
| Benign                                          | 3,737 (92.3%)                             | N/A                                           |
| Atypical                                        | 219 (5.4%)                                | N/A                                           |
| Malignant                                       | 92 (2.3%)                                 | N/A                                           |
| <b>Adjuvant radiotherapy</b>                    |                                           |                                               |
| All grades                                      | 211 (5.2%)                                | N/A                                           |
| Benign                                          | 173 (4.6%)                                | N/A                                           |
| Atypical                                        | 16 (7.3%)                                 | N/A                                           |
| Malignant                                       | 22 (23.9%)                                | N/A                                           |
| <b>Use of antiepileptic drugs 3 years later</b> |                                           |                                               |
| All grades                                      | 1,098 (27.1%)                             | 1,243 (6.1%)                                  |
| Benign                                          | 999 (26.7%)                               | N/A                                           |
| Atypical                                        | 62 (28.3%)                                | N/A                                           |
| Malignant                                       | 37 (40.2%)                                | N/A                                           |

|                                     |            |            |
|-------------------------------------|------------|------------|
| <b>2-year mortality</b>             |            |            |
| All grades                          | 144 (3.6%) | 270 (1.3%) |
| Benign                              | 125 (3.3%) | N/A        |
| Atypical                            | 10 (4.6%)  | N/A        |
| Malignant                           | 9 (9.8%)   | N/A        |
| <b>5-year mortality<sup>‡</sup></b> |            |            |
| All grades                          | 139 (7.0%) | 355 (3.6%) |
| Benign                              | 116 (6.3%) | N/A        |
| Atypical                            | 9 (11.0%)  | N/A        |
| Malignant                           | 14 (26.9%) | N/A        |

Abbreviations: DOM, *département d'outre-mer* (overseas *département*); N/A, not applicable

\*North East: Grand-Est, Bourgogne Franche-Comté, Hauts-de-France. Paris Ile-de-France: city of Paris and Ile-de-France. North West: Bretagne, Centre Val de Loire, Normandie, Pays de la Loire. South East: Auvergne-Rhône-Alpes, Provence-Alpes-Côte d'Azur, Corse. South East: Nouvelle-Aquitaine, Occitanie. DOM: Guadeloupe, Martinique, Guyane, la Réunion

†Tumors may occur at multiple sites in the same individual

‡ Restricted inclusion period:2008-2017

**Table K. Cumulative dose exposure for each progestogen in cases and controls**

| <b>Progestogen</b>                 | <b>Cumulative dose</b> |                 |
|------------------------------------|------------------------|-----------------|
|                                    | <b>Cases</b>           | <b>Controls</b> |
| <b>Progesterone (oral/vaginal)</b> | 27,000 (93,000)        | 30,054 (99,000) |
| <b>Progesterone (percutaneous)</b> | 30,800 (7,760)         | 7,800 (106,200) |
| <b>Dydrogesterone</b>              | 1,500 (11,160)         | 904 (6,280)     |
| <b>Hydroxyprogesterone</b>         | N/A                    | 6,000 (6,750)   |
| <b>Medrogestone</b>                | 8,350 (21,157.5)       | 2,600 (9,950)   |
| <b>Medroxyprogesterone acetate</b> | 3,609 (5,100)          | 1,575 (2,951)   |
| <b>Promegetone</b>                 | 200.4 (1,322)          | 129.5 (679)     |
| <b>Spirolactone</b>                | 9,000 (45,000)         | 9,750 (47,250)  |
| <b>Chlormadinone acetate</b>       | 9,000 (18,810)         | 1,720 (7,800)   |
| <b>Nomegestrol acetate</b>         | 4,750 (9,450)          | 600 (2,417.5)   |
| <b>Cyproterone acetate</b>         | 56,000 (87,000)        | 12,200 (35,000) |

Abbreviations: mg, milligram

\*from 2006 on, according to the Define Daily Dose (DDD)

**Table L. Duration of exposure to medrogestone, medroxyprogesterone acetate, promegestone, chlormadinone acetate, nomegestrol acetate and cyproterone acetate in exposed cases (N = 18,061) and controls (N=90,305)**

|                                    | Duration of observed exposure* (years) | Cases      |              | Controls     |              |
|------------------------------------|----------------------------------------|------------|--------------|--------------|--------------|
|                                    |                                        | N          | %            | N            | %            |
| <b>Medrogestone</b>                | < 1                                    | 2          | 4.8          | 16           | 20.3         |
|                                    | [1; 2[                                 | 1          | 2.4          | 6            | 7.6          |
|                                    | [2; 3[                                 | 0          | 0.0          | 8            | 11.4         |
|                                    | ≥ 3                                    | 39         | 92.8         | 49           | 62.0         |
|                                    | <i>All</i>                             | <i>42</i>  | <i>100.0</i> | <i>79</i>    | <i>100.0</i> |
| <b>Medroxyprogesterone acetate</b> | < 1                                    | 1          | 11.1         | 1            | 9.1          |
|                                    | [1; 2[                                 | 0          | 0.0          | 1            | 9.1          |
|                                    | [2; 3[                                 | 1          | 11.1         | 3            | 27.3         |
|                                    | ≥ 3                                    | 7          | 77.8         | 6            | 54.5         |
|                                    | <i>All</i>                             | <i>9</i>   | <i>100.0</i> | <i>11</i>    | <i>100.0</i> |
| <b>Promegestone</b>                | < 1                                    | 17         | 20.5         | 73           | 32.4         |
|                                    | [1; 2[                                 | 9          | 10.8         | 29           | 12.9         |
|                                    | [2; 3[                                 | 3          | 3.6          | 10           | 4.0          |
|                                    | ≥ 3                                    | 54         | 65.1         | 114          | 50.7         |
|                                    | <i>All</i>                             | <i>83</i>  | <i>100.0</i> | <i>225</i>   | <i>100.0</i> |
| <b>Chlormadinone acetate</b>       | < 1                                    | 101        | 16.1         | 392          | 41.3         |
|                                    | [1; 2[                                 | 58         | 9.2          | 148          | 15.6         |
|                                    | [2; 3[                                 | 53         | 8.4          | 81           | 8.6          |
|                                    | ≥ 3                                    | 416        | 66.2         | 325          | 34.5         |
|                                    | <i>All</i>                             | <i>628</i> | <i>100.0</i> | <i>946</i>   | <i>100.0</i> |
| <b>Nomegestrol acetate</b>         | <1                                     | 106        | 11.5         | 471          | 42.0         |
|                                    | [1; 2[                                 | 65         | 7.0          | 186          | 16.6         |
|                                    | [2; 3[                                 | 52         | 5.6          | 105          | 9.4          |
|                                    | ≥3                                     | 702        | 75.9         | 359          | 32.0         |
|                                    | <i>All</i>                             | <i>925</i> | <i>100.0</i> | <i>1,121</i> | <i>100.0</i> |
| <b>Cyproterone acetate</b>         | < 1                                    | 25         | 2.8          | 58           | 22.6         |
|                                    | [1; 2[                                 | 28         | 3.1          | 29           | 11.3         |
|                                    | [2; 3[                                 | 36         | 4.0          | 17           | 6.6          |
|                                    | ≥ 3                                    | 802        | 90.1         | 152          | 59.3         |
|                                    | <i>All</i>                             | <i>891</i> | <i>100.0</i> | <i>256</i>   | <i>100.0</i> |

\*≥ 1 year and < 2 years" for example: at least one dispensation issued between d-1 and d-365 and at least one dispensation between d-366 and d-730 and no prescription issued between d-731 and d-1,095 (use in years y-1 and y-2 and no use in year y-3).



**Table M. Association between exposure to medrogestone, medroxyprogesterone acetate, and promegestone and risk of surgically treated intracranial meningioma: analyses by age group, location, and severity grade**

|                                     | TOTAL  |          | Medrogestone (current exposure) |                 |                      | Medroxyprogesterone (current exposure) |                 |                      | Promegestone (current exposure) |                 |                     |
|-------------------------------------|--------|----------|---------------------------------|-----------------|----------------------|----------------------------------------|-----------------|----------------------|---------------------------------|-----------------|---------------------|
|                                     | Cases  | Controls | Within cases                    | Within controls | OR (CI 95)*          | Within cases                           | Within controls | OR (CI 95)*          | Within cases                    | Within controls | OR (CI 95)*         |
|                                     | N      | N        | n (%)                           | n (%)           |                      | n (%)                                  | n (%)           |                      | n (%)                           | n (%)           |                     |
| <b>ALL N(%)</b>                     | 18,061 | 90,305   | 42 (0.2%)                       | 79 (0.1%)       | 3.49 (2.38 to 5.10)  | 9 (0.0%)                               | 11 (0.0%)       | 5.55 (2.27 to 13.56) | 83 (0.5%)                       | 225 (0.2%)      | 2.39 (1.85 to 3.09) |
| <b>Analyses in subgroups</b>        |        |          |                                 |                 |                      |                                        |                 |                      |                                 |                 |                     |
| <b>Age (years)</b>                  |        |          |                                 |                 |                      |                                        |                 |                      |                                 |                 |                     |
| < 35                                | 587    | 2,935    | 0                               | 2 (0.1%)        | N/A                  | 1 (0.2%)                               | 1 (0.0%)        | N/A                  | 0                               | 2 (0.1%)        | N/A                 |
| 35 to 44                            | 2,181  | 10,905   | 3 (0.1%)                        | 12 (0.1%)       | N/A                  | 2 (0.1%)                               | 3 (0.0%)        | N/A                  | 10 (0.5%)                       | 35 (0.3%)       | 1.88 (0.92 to 3.83) |
| 45 to 54                            | 4,830  | 24,150   | 25 (0.5%)                       | 40 (0.2%)       | 4.53 (2.73 to 7.53)  | 5 (0.1%)                               | 6 (0.0%)        | N/A                  | 49 (1.0%)                       | 135 (0.6%)      | 2.52 (1.81 to 3.51) |
| 55 to 64                            | 4,760  | 23,800   | 9 (0.2%)                        | 15 (0.1%)       | 3.56 (1.56 to 8.33)  | 1 (0.0%)                               | 1 (0.0%)        | N/A                  | 15 (0.3%)                       | 39 (0.2%)       | 2.10 (1.15 to 3.82) |
| ≥ 65                                | 5,703  | 28,515   | 5 (0.1%)                        | 10 (0.0%)       | N/A                  | 0                                      | 0               | N/A                  | 9 (0.2%)                        | 14 (0.0%)       | 3.21 (1.39 to 7.43) |
| <b>Analyses with refined events</b> |        |          |                                 |                 |                      |                                        |                 |                      |                                 |                 |                     |
| <b>Anatomical location</b>          |        |          |                                 |                 |                      |                                        |                 |                      |                                 |                 |                     |
| Anterior skull base                 | 3,979  | 19,895   | 6 (0.1%)                        | 17 (0.1%)       | 2.64 (1.02 to 6.82)  | 2 (0.1%)                               | 3 (0.0%)        | N/A                  | 25 (0.6%)                       | 56 (0.3%)       | 3.15 (1.95 to 5.10) |
| Middle skull base                   | 3,911  | 19,555   | 13 (0.3%)                       | 13 (0.1%)       | 8.30 (3.70 to 18.63) | 4 (0.1%)                               | 2 (0.0%)        | N/A                  | 22 (0.6%)                       | 56 (0.3%)       | 3.03 (1.82 to 5.02) |
| Posterior skull base                | 2,156  | 10,780   | 2 (0.1%)                        | 8 (0.1%)        | N/A                  | 0                                      | 1 (0.0%)        | N/A                  | 9 (0.4%)                        | 28 (0.3%)       | 1.80 (0.85 to 3.82) |
| Convexity                           | 6,468  | 32,340   | 19 (0.3%)                       | 34 (0.1%)       | 3.55 (2.00 to 6.28)  | 1 (0%)                                 | 5 (0.0%)        | N/A                  | 25 (0.4%)                       | 78 (0.2%)       | 1.96 (1.24 to 3.09) |
| Falx and tentorium                  | 1,963  | 9,815    | 2 (0.1%)                        | 9 (0.1%)        | N/A                  | 3 (0.2%)                               | 0               | N/A                  | 3 (0.2%)                        | 10 (0.1%)       | N/A                 |
| <b>Severity</b>                     |        |          |                                 |                 |                      |                                        |                 |                      |                                 |                 |                     |
| Benign                              | 16,662 | 83,310   | 37 (0.2%)                       | 68 (0.1%)       | 3.57 (2.37 to 5.37)  | 9 (0.1%)                               | 10 (0.0%)       | 6.21 (2.50 to 15.48) | 81 (0.5%)                       | 215 (0.3%)      | 2.43 (1.87 to 3.15) |
| Atypical                            | 1,047  | 5,235    | 5 (0.5%)                        | 10 (0.2%)       | N/A                  | 0                                      | 1 (0.0%)        | N/A                  | 2 (0.2%)                        | 9 (0.2%)        | N/A                 |
| Malignant                           | 352    | 1,760    | 0                               | 1 (0.1%)        | N/A                  | 0                                      | 0               | N/A                  | 0                               | 1 (0.1%)        | N/A                 |

Abbreviations: CI 95, 95% confidence interval; N/A, Not Applicable; OR, odds ratio

Percentages for cases were calculated relative to the total number of cases in the analysis considered (e.g., for the 45-54 age group: relative to N=4,830). Same for controls.

Current exposure: at least one dispensation in the year prior to the index date and no exposure to chlormadinone, nomegestrol and cyproterone acetate in the 3 years prior to the index date.

Reading example 1 (analysis for women aged 45 to 54): 25 (0.5%) of the 4830 women who underwent surgery for meningioma were exposed to medrogestone; 40 (0.2%) of the 24,150 control women were exposed to medrogestone; the estimated OR for the risk of surgically treated meningioma following exposure to medrogestone versus no exposure was 4.53.

Reading example 2 (analysis of the risk of surgically treated meningioma in the mid-skull base): 13 (0.3%) of the 3,911 women with mid-skull base meningioma requiring surgery were exposed to medrogestone; 13 (0.1%) of the 19,555 control women were exposed to medrogestone; the estimated OR for the risk of meningioma in the mid-skull base requiring surgery following exposure to medrogestone versus no exposure was 8.30.

\*Odds ratios involving less than 6 exposed cases are not shown.

**Table N. Association between exposure to chlormadinone acetate, nomegestrol acetate, and cyproterone acetate and the risk of surgically treated intracranial meningioma : analyses by age group, location, and grade of severity**

|                             | Total number for the analysis |          | Chlormadinone acetate (current exposure) |                 |                      | Nomegestrol acetate (current exposure) |                 |                       | Cyproterone acetate (current exposure) |                 |                        |
|-----------------------------|-------------------------------|----------|------------------------------------------|-----------------|----------------------|----------------------------------------|-----------------|-----------------------|----------------------------------------|-----------------|------------------------|
|                             | Cases                         | Controls | Within cases                             | Within controls |                      | Within cases                           | Within controls |                       | Within cases                           | Within controls |                        |
|                             | N                             | N        | n (%)                                    | n(%)            | OR [95% CI]*         | n (%)                                  | n (%)           | OR 95% CI]*           | n(%)                                   | n(%)            | OR [95% CI]*           |
| <b>All N (%)</b>            | 18 061                        | 90 305   | 628 (3.5%)                               | 946 (1.1%)      | 3.87 [3.48 to 4.30]  | 925 (5.1%)                             | 1121 (1.2%)     | 4.93 [4.50 to 5.41]   | 891 (4.9%)                             | 256 (0.3%)      | 19.21 [16.61 to 22.22] |
| <b>Age (years)</b>          |                               |          |                                          |                 |                      |                                        |                 |                       |                                        |                 |                        |
| < 35                        | 587                           | 2,935    | 9 (1.5%)                                 | 22 (0.7%)       | 2.19 [1.00 to 4.77]  | 14 (2.4%)                              | 28 (1.0%)       | 2.71 [1.42 to 5.20]   | 62 (10.6%)                             | 27 (0.9%)       | 13.03 [8.06 to 21.04]  |
| 35-44                       | 2,181                         | 10,905   | 111 (5.1%)                               | 231 (2.1%)      | 2.87 [2.27 to 3.63]  | 143 (6.6%)                             | 208 (1.9%)      | 4.03 [3.23 to 5.03]   | 242 (11.1%)                            | 59 (0.5%)       | 23.29 [17.22 to 31.51] |
| 45-54                       | 4,830                         | 24,150   | 428 (8.9%)                               | 598 (2.5%)      | 4.27 [3.74 to 4.87]  | 556 (11.5%)                            | 741 (3.1%)      | 4.60 [4.09 to 5.18]   | 371 (7.7%)                             | 122 (0.5%)      | 16.84 [13.59 to 20.87] |
| 55-64                       | 4,760                         | 23,800   | 74 (1.6%)                                | 80 (0.3%)       | 4.76 [3.46 to 6.55]  | 164 (3.4%)                             | 122 (0.5%)      | 7.57 [5.94 to 9.66]   | 148 (3.1%)                             | 33 (0.1%)       | 23.69 [16.08 to 34.90] |
| ≥ 65                        | 5,703                         | 28,515   | 6 (0.1%)                                 | 15 (0.1%)       | 2.00 [0.78 to 5.15]  | 48 (0.8%)                              | 22 (0.1%)       | 10.91 [6.59 to 18.07] | 68 (1.2%)                              | 15 (0.1%)       | 22.67 [12.96 to 39.65] |
| <b>Anatomical location</b>  |                               |          |                                          |                 |                      |                                        |                 |                       |                                        |                 |                        |
| Anterior base of the skull  | 3,979                         | 19,895   | 149 (3.7%)                               | 239 (1.2%)      | 3.78 [3.05 to 4.70]  | 281 (7.1%)                             | 288 (1.4%)      | 6.41 [5.35 to 7.67]   | 335 (8.4%)                             | 53 (0.3%)       | 35.28 [25.99 to 47.88] |
| Mid-base of the skull       | 3,911                         | 19,555   | 233 (6.0%)                               | 252 (1.3%)      | 5.81 [4.80 to 7.04]  | 310 (7.9%)                             | 279 (1.4%)      | 7.35 [6.15 to 8.78]   | 278 (7.1%)                             | 50 (0.3%)       | 31.21 [22.70 to 42.90] |
| Posterior base of the skull | 2,156                         | 10,780   | 47 (2.2%)                                | 108 (1.0%)      | 2.33 [1.64 to 3.30]  | 64 (3.0%)                              | 122 (1.1%)      | 2.76 [2.02 to 3.75]   | 40 (1.9%)                              | 33 (0.3%)       | 6.62 [4.09 to 10.70]   |
| Convexity                   | 6,468                         | 32,340   | 193 (3.0%)                               | 303 (0.9%)      | 3.66 [3.04 to 4.42]  | 249 (3.8%)                             | 372 (1.1%)      | 3.79 [3.21 to 4.48]   | 247 (3.8%)                             | 93 (0.3%)       | 14.86 [11.55 to 19.10] |
| Falx cerebri and tentorium  | 1,963                         | 9,815    | 33 (1.7%)                                | 83 (0.8%)       | 2.13 [1.41 to 3.22]  | 56 (2.8%)                              | 104 (1.1%)      | 3.05 [2.17 to 4.27]   | 53 (2.7%)                              | 33 (0.3%)       | 8.03 [5.20 to 12.40]   |
| <b>Severity</b>             |                               |          |                                          |                 |                      |                                        |                 |                       |                                        |                 |                        |
| Benign                      | 16,662                        | 83,310   | 578 (3.5%)                               | 879 (1.1%)      | 3.83 [3.43 to 4.27]  | 854 (5.1%)                             | 1045 (1.3%)     | 4.89 [4.44 to 5.38]   | 817 (4.9%)                             | 233 (0.3%)      | 19.15 [16.46 to 22.29] |
| Atypical                    | 1,047                         | 5,235    | 39 (3.7%)                                | 55 (1.1%)       | 4.14 [2.69 to 6.38]  | 58 (5.5%)                              | 61 (1.2%)       | 5.72 [3.91 to 8.36]   | 56 (5.3)                               | 19 (0.4%)       | 19.15 [10.64 to 34.44] |
| Malignant                   | 352                           | 1,760    | 11 (3.1%)                                | 12 (0.7%)       | 5.78 [2.39 to 14.00] | 13 (3.7%)                              | 15 (0.9%)       | 4.95 [2.29 to 10.68]  | 18 (5.1%)                              | 4 (0.2%)        | 22.50 [7.61 to 66.48]  |

Abbreviations: 95% CI, 95% confidence interval; OR, odds ratio; N/A, not applicable

Percentages for cases were calculated relative to the total number of cases in the analysis considered (e.g., for the 45-54 age group: relative to N = 4,830). Same for controls.

Current exposure: at least one dispensation in the year prior to the index date and no exposure to cyproterone acetate in the 3 years prior to the index date (for the analyses of chlormadinone and nomegestrol acetate)

**Table O. Numbers and percentage of meningiomas located in the anterior base or the mid-base of the skull among exposed and non-exposed cases**

|                          |                             | <b>Numbers of meningiomas located in the anterior base or mid-base of the skull/number of meningiomas in total*</b> | <b>Percentage of meningiomas located in the anterior base or mid-base of the skull</b> | <b>OR (95% CI)**</b>   |
|--------------------------|-----------------------------|---------------------------------------------------------------------------------------------------------------------|----------------------------------------------------------------------------------------|------------------------|
|                          |                             | <b>n</b>                                                                                                            | <b>% (95% CI)</b>                                                                      |                        |
| <b>Exposed cases</b>     | Medrogestone                | 19/42                                                                                                               | 45.2% (45.3% to 66.6%)                                                                 | 3.49 (2.38 to 5.10)    |
|                          | Medroxyprogesterone acetate | 6/10                                                                                                                | 60.0% (29.6% to 90.4%)                                                                 | 5.55 (2.27 to 13.56)   |
|                          | Promegestone                | 47/84                                                                                                               | 56.0% (45.3% to 66.6%)                                                                 | 2.39 (1.85 to 3.09)    |
|                          | Chlormadinone acetate       | 382/655                                                                                                             | 58.3% (54.5% to 62.1%)                                                                 | 3.87 (3.48 to 4.30)    |
|                          | Nomegestrol acetate         | 591/960                                                                                                             | 61.6% (58.5% to 64.6%)                                                                 | 4.93 (4.50 to 5.41)    |
|                          | Cyproterone acetate         | 613/953                                                                                                             | 64.3% (61.3% to 67.4%)                                                                 | 19.21 (16.61 to 22.22) |
| <b>Non-exposed cases</b> |                             | 6,232/15,773                                                                                                        | 39.5% (38.7% to 40.3%)                                                                 | N/A                    |

Abbreviations: CI 95, 95% confidence interval; N/A, non-applicable; OR, odds ratio

\*Each case may have several meningioma locations

\*\*OR of total meningioma risk (regardless of location) associated with each progestogen of interest

Abbreviations: CI 95, 95% confidence interval; OR, odds ratio

\*Each case may have several meningioma locations

\*\*OR of total meningioma risk (regardless of location) associated with each progestogen of interest

**Table P. Associations between exposure to oral, intra-vaginal, intra-muscular, or percutaneous progestogens and the risk of surgically treated intracranial meningioma , with all the modes of exposure used**

| Analysis                                                    | Cases<br>N= 18,061<br>n (%) | Controls<br>N= 90,305<br>n (%) | OR* (95% CI)                  |
|-------------------------------------------------------------|-----------------------------|--------------------------------|-------------------------------|
| <b>Oral progesterone</b>                                    |                             |                                |                               |
| Isolated exposure to oral progesterone                      | 329 (1.8%)                  | 2,149 (2.4%)                   | 0.88 (0.78 to 0.99)           |
| <i>CMA and/or NOMAC and/or CPA in the preceding 3 years</i> | <i>2,999 (16.6%)</i>        | <i>4,218 (4.7%)</i>            | <i>4.67 (4.42 to 4.93)</i>    |
| <b>Percutaneous progesterone</b>                            |                             |                                |                               |
| Isolated exposure to percutaneous progesterone              | 90 (0.5%)                   | 503 (0.6%)                     | 1.11 (0.89 to 1.40)           |
| <i>CMA and/or NOMAC and/or CPA in the preceding 3 years</i> | <i>2,999 (16.6%)</i>        | <i>4,218 (4.7%)</i>            | <i>4.69 (4.44 to 4.95)</i>    |
| <b>Hydroxyprogesterone</b>                                  |                             |                                |                               |
| Isolated exposure to hydroxyprogesterone                    | 0 (0.0%)                    | 3 (0.0%)                       | N/A                           |
| <i>CMA and/or NOMAC and/or CPA in the preceding 3 years</i> | <i>2,999 (16.6%)</i>        | <i>4,218 (4.7%)</i>            | <i>4.68 (4.44 to 4.95)</i>    |
| <b>Medrogestone</b>                                         |                             |                                |                               |
| Isolated exposure to medrogestone                           | 42 (0.2%)                   | 79 (0.1%)                      | 3.49 (2.38 to 5.10)           |
| <i>CMA and/or NOMAC and/or CPA in the preceding 3 years</i> | <i>2,999 (16.6%)</i>        | <i>4,218 (4.7%)</i>            | <i>4.70 (4.45 to 4.97)</i>    |
| <b>Dydrogesterone</b>                                       |                             |                                |                               |
| Isolated exposure to dydrogesterone                         | 156 (0.9%)                  | 990 (1.1%)                     | 0.96 (0.81 to 1.14)           |
| <i>CMA and/or NOMAC and/or CPA in the preceding 3 years</i> | <i>2,999 (16.6%)</i>        | <i>4,218 (4.7%)</i>            | <i>4.68 (4.43 to 4.94)</i>    |
| <b>Medroxyprogesterone acetate</b>                          |                             |                                |                               |
| Isolated exposure                                           | 9 (0.05%)                   | 11 (0.01%)                     | 5.55 (2.27 to 13.56)          |
| <i>CMA and/or NOMAC and/or CPA in the preceding 3 years</i> | <i>2,999 (16.6%)</i>        | <i>4,218 (4.7%)</i>            | <i>4.69 (4.44 to 4.95)</i>    |
| <b>Promegestone</b>                                         |                             |                                |                               |
| Isolated exposure to promegestone                           | 83 (0.5%)                   | 225 (0.2%)                     | 2.39 (1.85 to 3.09)           |
| <i>CMA and/or NOMAC and/or CPA in the preceding 3 years</i> | <i>2,999 (16.6%)</i>        | <i>4,218 (4.7%)</i>            | <i>4.72 (4.46 to 4.98)</i>    |
| <b>Dienogest</b>                                            |                             |                                |                               |
| Isolated exposure                                           | 3 (0.02%)                   | 11 (0.01%)                     | N/A                           |
| <i>CMA and/or NOMAC and/or CPA in the preceding 3 years</i> | <i>2,999 (16.6%)</i>        | <i>4,218 (4.7%)</i>            | <i>4.69 (4.44 to 4.95)</i>    |
| <b>Sprionolactone</b>                                       |                             |                                |                               |
| Isolated exposure to spironolactone                         | 264 (1.5%)                  | 1,473 (1.6%)                   | 0.95 (0.84 to 1.09)           |
| <i>CMA and/or NOMAC and/or CPA in the preceding 3 years</i> | <i>2,999 (16.6%)</i>        | <i>4,218 (4.7%)</i>            | <i>4.68 (4.43 to 4.95)</i>    |
| <b>Chlormadinone acetate</b>                                |                             |                                |                               |
| Isolated exposure to chlormadinone acetate                  | 628 (3.5%)                  | 946 (1.0%)                     | 3.87 (3.48 to 4.30)           |
| <i>CMA and/or NOMAC and/or CPA in the preceding 3 years</i> | <i>1,012 (5.6%)</i>         | <i>428 (0.5%)</i>              | <i>13.81 (12.26 to 15.56)</i> |
| <b>Nomegestrol acetate</b>                                  |                             |                                |                               |
| Isolated exposure to nomegestrol acetate                    | 925 (5.1%)                  | 1,121 (1.2%)                   | 4.93 (4.50 to 5.41)           |
| <i>CMA and/or NOMAC and/or CPA in the preceding 3 years</i> | <i>1,012 (5.6%)</i>         | <i>428 (0.5%)</i>              | <i>14.17 (12.57 to 15.97)</i> |
| <b>Cyproterone acetate</b>                                  |                             |                                |                               |
| Exposure to cyproterone acetate                             | 891 (4.9%)                  | 256 (0.3%)                     | 19.21 (16.61 to 22.22)        |

Abbreviations: 95% CI, 95% confidence interval; CMA, chlormadinone acetate; CPA, cyproterone acetate; NOMAC, nomegestrol acetate; OR, odds ratio

**Table Q. Associations between exposure to progestogens in intrauterine systems and copper intrauterine devices and the risk of surgically treated intracranial meningioma , with all the modes of exposure used**

| <b>Analysis</b>                                                | <b>Cases<br/>n (%)</b> | <b>Controls<br/>n (%)</b> | <b>OR (95% CI)</b>  |
|----------------------------------------------------------------|------------------------|---------------------------|---------------------|
| <b>IUS levonorgestrel 52 mg</b>                                | N = 15,162             | N = 75,810                |                     |
| Isolated exposure to an IUD loaded with 52 mg levonorgestrel   | 566 (3.7%)             | 3,888 (5.1%)              | 0.94 [0.86 to 1.04] |
| CMA and/or NOMAC and/or CPA in the preceding 3 years           | 2,471 (16.3%)          | 3,417 (4.5 %)             | 4.75 [4.47 to 5.05] |
| <b>IUS levonorgestrel 13.5 mg</b>                              | N = 4,048              | N = 20,240                |                     |
| Isolated exposure to an IUD loaded with 13.5 mg levonorgestrel | 10 (0.2%)              | 48 (0.2%)                 | 1.39 [0.70 to 2.77] |
| CMA and/or NOMAC and/or CPA in the preceding 3 years           | 588 (14.5%)            | 770 (3.8%)                | 4.99 [4.41 to 5.65] |
| <b>Copper IUD</b>                                              | N = 15,162             | N = 75,810                |                     |
| Isolated exposure to a copper IUD                              | 452 (3.0%)             | 2,642 (3.5%)              | 1.13 [1.01 to 1.25] |
| CMA and/or NOMAC and/or CPA in the preceding 3 years           | 2,471 (16.3%)          | 3,417 (4.5%)              | 4.81 [4.53 to 5.12] |

Abbreviations: 95% CI, 95% confidence interval; CMA, chlormadinone acetate; CPA, cyproterone acetate; IUD, intrauterine device; IUS, intrauterine system; NOMAC, nomegestrol acetate; OR, odds ratio

**Table R. Associations between exposure to oral, percutaneous, intra-vaginal, and intra-muscular progestogen and risk of surgically-treated intracranial meningioma, and by sub-class**

|                                                                                                           | Cases        | Controls     |                        |
|-----------------------------------------------------------------------------------------------------------|--------------|--------------|------------------------|
|                                                                                                           | N = 18,061   | N = 90,305   | OR* (CI 95)            |
|                                                                                                           | n (%)        | n (%)        |                        |
| <b>Hydroxyprogesterone</b>                                                                                | 0 (0.00%)    | 3 (0.00%)    | N/A                    |
| <b>Medrogestone</b>                                                                                       | 42 (0.2%)    | 79 (0.1%)    | 3.49 (2.38 to 5.10)    |
| <b>Medroxyprogesterone acetate</b>                                                                        | 9 (0.05%)    | 11 (0.01%)   | 5.55 (2.27 to 13.56)   |
| <b>Promegestone</b>                                                                                       | 83 (0.5%)    | 225 (0.2%)   | 2.39 (1.85 to 3.09)    |
| <b>Chlormadinone acetate</b>                                                                              | 628 (3.5%)   | 946 (1.0%)   | 3.87 (3.48 to 4.30)    |
| <b>Nomegestrol acetate</b>                                                                                | 925 (5.1%)   | 1,121 (1.2%) | 4.93 (4.50 to 5.41)    |
| <b>Cyproterone acetate</b>                                                                                | 891 (4.9%)   | 256 (0.3%)   | 19.21 (16.61 to 22.22) |
| <b>17 to OH to progesterone (3)</b><br>Hydroxyprogesterone -<br>Medrogestone -<br>Medroxyprogesterone -   | 51 (0.28%)   | 93 (0.10%)   | 3.61 (2.55 to 5.10)    |
| <b>17-OH-progesterone (5)</b><br>Hydroxyprogesterone-<br>Medrogestone-<br>Medroxyprogesterone-<br>CPA-CMA | 1,584 (8.7%) | 1,320 (1.5%) | 7.00 (6.48 to 7.58)    |
| <b>19-nor-progesterone</b><br>NOMAC-Promegestone                                                          | 1,015 (5.6%) | 1,390 (1.5%) | 4.35 (4.00 to 4.74)    |

Abbreviations: CI 95, 95% confidence interval; CMA, chlormadinone acetate; ; CPA, cyproterone acetate; NOMAC, nomegestrol acetate. OR, odds ratio.

17-OH-progesterone (3): current exposure to hydroxyprogesterone and/or medrogestone and/or medroxyprogesterone

17-OH-progesterone (5): current exposure to hydroxyprogesterone and/or medrogestone and/or medroxyprogesterone and/or CPA and/or CMA

19-nor-progesterone: current exposure to promegestone and/or NOMAC

\*Odds ratios involving less than 6 exposed cases are not shown.

**Table S. SAS code of statistical analysis**

```

*****;
*****;
* macro definition (conditional logistic regression for our data);
*****;
*****;

%macro condlogreg(input=base, selection=(1), mode=current,
var_exp_1=, var_exp_2=, list_var_exp_9=,
cl=wald, list_var_strata=, nb_controls=, output=);
    %* mode : current or short_prolonged;
    %* definition of the exposure variable exp :
    - for mode=current :
    + exp=0
    + if &var_exp_1.=1 ==> exp=1 (modality of main interest)
    + if at least one of the variables in &list_var_exp_9. is equal to 1
    (&list_var_exp_9. may be empty)
    ==> exp=9 (modality serving for adjustment)
    - for mode=short_prolonged :
    + exp=0
    + if (&var_exp_1.=1) and (&var_exp_2.=0) ==> exp=1
    + if (&var_exp_1.=1) and (&var_exp_2.=1) ==> exp=2
    + if at least one of the variables in &list_var_exp_9. is equal to 1
    (&list_var_exp_9. may be empty)
    ==> exp=9 (modality serving for adjustment);
    %* cl (confidence limits) : wald or pl (profile likelihood)
note : pl requires nb_controls=1;
    %* list_var_strata : list of variables to be used in the strata statement;
    %* nb_controls : number of controls per case
    (if empty, all controls in the input data set are used)
note : if 1 control per case ==> transformed data approach;
    %* input : input data set
    (default : base,
    one row per patient,
    the following variables are expected :
    - id_pat : patient identifier
    - case : 1 – case, 0 – control
    - id_pat_case :
for cases, the patient identifier
for controls, the patient identifier of the corresponding case
    - no_control (for controls only) :
sequential numbering of all controls for a given case (1,2,...)
    - the variables related to exposure and used for the parameters
var_exp_1, var_exp_2 and list_var_exp_9
[for example in our the analysis by short-term and prolonged
exposure, i.e. with mode= short_prolonged, for dydrogesterone
(our medication code 3), we used
var_exp_1=med_code_3_1a365
(1 - at least one dispensation of dydrogesterone
in the year prior to the index date
0 - otherwise)
var_exp_2= med_code_3_366a730
(1 - at least one dispensation of dydrogesterone
in the 2nd year before the index date
0 - otherwise)
list_var_exp_9=
med_code_7_1a1095 med_code_8_1a1095 med_code_9_1a1095
(coding the presence of at least one dispensation of
nomegestrol, chlormadinone and cyproterone acetate
(our medication codes 7, 8, 9), respectively,
in the 3 years prior to the index date)]
- the variables used for the parameter list_var_strata
[typically id_pat_case, but other choices are possible
(see e.g. Mansournia 2018 AJE)];
%* selection : selection criterion applied to the input data set
(default : no selection);
%* output : output data set with the number of exposed cases, the number of
exposed controls and the estimated odds ratios, including confidence

```

```

limits;
%if &cl.=pl and not(&nb_controls.=1) %then %do;
%goto endofmacro;
%end;
%if (&mode.=current) %then %do;
%let var_exp_2=dummy;
%end;
%let cond_var_exp_9=(0);
%let cont=1;
%let i=0;
%do %while(&cont.);
%let i=%eval(&i.+1);
%let var_exp_9=%scan(&list_var_exp_9.,&i.);
%if %length(&var_exp_9.)>0 %then %do;
%let cond_var_exp_9=&cond_var_exp_9. or (&var_exp_9.=1);
%end;
%else %do;
%let cont=0;
%end;
%end;
%put cond_var_exp_9=&cond_var_exp_9.;
data macro_base;
set &input.(where=((&selection.)
%if %length(&nb_controls.)>0 %then %do;
and ((case=1) or ((case=0) and (no_control le &nb_controls.)))
%end;
));
exp=0;
%if &mode.=current %then %do;
dummy=0;
if &var_exp_1.=1 then exp=1;
%end;
%if &mode.=short_prolonged %then %do;
if (&var_exp_1.=1) and (&var_exp_2.=0) then exp=1;
if (&var_exp_1.=1) and (&var_exp_2.=1) then exp=2;
%end;
if &cond_var_exp_9.
then exp=9;
exp_1=0;
if exp=1 then exp_1=1;
exp_2=0;
if exp=2 then exp_2=1;
exp_3=0;
if exp=3 then exp_3=1;
exp_9=0;
if exp=9 then exp_9=1;
run;
proc freq data=macro_base;
tables exp*case/out=macro_stat outpct;
run;
data macro_test;
set macro_base(where=((&var_exp_1.>0) or (&var_exp_2.>0)));
run;
%let nb_exp_1_2=;
proc sql noprint;
select nobs into :nb_exp_1_2 separated by ' ' from dictionary.tables
where libname='WORK' and memname='MACRO_TEST';
quit;
%if &nb_exp_1_2.>0 %then %do;
%if %length(&nb_controls.)=0 or (&nb_controls.>1) %then %do;
ods output ParameterEstimates=macro_est CLOdds&cl.=macro_or
ConvergenceStatus=macro_conv;
proc logistic data=macro_base;
strata &list_var_strata. / nosummary;
model case(event='1')=exp_1 exp_2 exp_3 exp_9/ clodds=&cl.;
run;
ods output close;
%end;
%if &nb_controls.=1 %then %do;
%* see + conditional analysis using transformed data + in
https://support.sas.com/documentation/onlinedoc/stat/131/logistic.pdf;

```



```

proc sort data=macro_base;
by id_pat_case no_control;
run;
data macro_base_trans(
keep=id_pat_case
exp_1_case exp_1_control exp_2_case exp_2_control
exp_3_case exp_3_control exp_9_case exp_9_control
delta_exp_1 delta_exp_2 delta_exp_3 delta_exp_9 zero);
merge macro_base(where=(case=1)
rename=(exp_1=exp_1_case exp_2=exp_2_case exp_3=exp_3_case
exp_9=exp_9_case))
macro_base(where=(no_control=1)
rename=(exp_1=exp_1_control exp_2=exp_2_control exp_3=exp_3_control
exp_9=exp_9_control));
by id_pat_case;
delta_exp_1=exp_1_case-exp_1_control;
delta_exp_2=exp_2_case-exp_2_control;
delta_exp_3=exp_3_case-exp_3_control;
delta_exp_9=exp_9_case-exp_9_control;
zero=0;
run;
ods output ParameterEstimates=macro_est CLOdds&cl.=macro_or
ConvergenceStatus=macro_conv;
proc logistic data=macro_base_trans;
model zero=delta_exp_1 delta_exp_2 delta_exp_3 delta_exp_9 /
noint clodds=&cl.;
run;
ods output close;
%end;
data macro_est;
merge macro_est(keep=variable probchisq)
macro_or(keep=effect oddsratioest lowercl uppercl
rename=(effect=variable));
by variable;
run;
data macro_stat_exp_1(keep=exp nb_exp_among_cases pct_exp_among_cases
nb_exp_among_controls pct_exp_among_controls);
merge macro_stat(where=((exp=1) and (case=1))
rename=(count=nb_exp_among_cases pct_col=pct_exp_among_cases))
macro_stat(where=((exp=1) and (case=0))
rename=(count=nb_exp_among_controls pct_col=pct_exp_among_controls));
run;
data macro_stat_exp_2(keep=exp nb_exp_among_cases pct_exp_among_cases
nb_exp_among_controls pct_exp_among_controls);
merge macro_stat(where=((exp=2) and (case=1))
rename=(count=nb_exp_among_cases pct_col=pct_exp_among_cases))
macro_stat(where=((exp=2) and (case=0))
rename=(count=nb_exp_among_controls pct_col=pct_exp_ame=controls));
run;
data macro_stat_exp_3(keep=exp nb_exp_among_cases pct_exp_among_cases
nb_exp_among_controls pct_exp_among_controls);
merge macro_stat(where=((exp=3) and (case=1))
rename=(count=nb_exp_among_cases pct_col=pct_exp_among_cases))
macro_stat(where=((exp=3) and (case=0))
rename=(count=nb_exp_among_controls pct_col=pct_exp_among_controls));
run;
data macro_stat_exp_9(keep=exp nb_exp_among_cases pct_exp_among_cases
nb_exp_among_controls pct_exp_among_controls);
merge macro_stat(where=((exp=9) and (case=1))
rename=(count=nb_exp_among_cases pct_col=pct_exp_among_cases))
macro_stat(where=((exp=9) and (case=0))
rename=(count=nb_exp_among_controls pct_col=pct_exp_among_controls));
run;
data macro_stat_bis;
set macro_stat_exp_1
macro_stat_exp_2
macro_stat_exp_3
macro_stat_exp_9;
run;
%if %length(&nb_controls.)=0 or (&nb_controls.>1) %then %do;
%let variable_prefix=exp;

```

```

%end;
%else %do;
%let variable_prefix=delta_exp;
%end;
data macro_est(drop=variable);
set macro_est;
if variable("&variable_prefix._1" then exp=1;
if variable("&variable_prefix._2" then exp=2;
if variable("&variable_prefix._3" then exp=3;
if variable("&variable_prefix._9" then exp=9;
run;
data macro_est;
merge macro_stat_bis
macro_est;
by exp;
run;
data macro_est;
merge macro_est
macro_conv(keep=status reason);
run;
%end;
%else %do;
data macro_est;
comment="No exposure var_exp_1 or var_exp_2 observed";
run;
%end;
* macro_or;
data &output;
%if &mode.=current %then %do;
(where=((exp ne 2) and (exp ne 3)))
%end;
%if &mode.=short_prolonged %then %do;
(where=(exp ne 3))
%end;;
set &output;
macro_est(in=a);
if a then do;
selection="&selection.";
var_exp_1="&var_exp_1.";
var_exp_2="&var_exp_2.";
list_var_exp_9="&list_var_exp_9.";
nb_controls="&nb_controls.";
cl="&cl.";
end;
run;
%endofmacro;;
proc delete data=macro_stat; run;
proc delete data=macro_stat_exp_1; run;
proc delete data=macro_stat_exp_2; run;
proc delete data=macro_stat_exp_3; run;
proc delete data=macro_stat_exp_9; run;
proc delete data=macro_stat_bis; run;
proc delete data=macro_test; run;
proc delete data=macro_est; run;
proc delete data=macro_or; run;
proc delete data=macro_conv; run;
proc delete data=macro_test; run;
%if &nb_controls.=1 %then %do;
proc delete data=macro_base_trans; run;
%end;
%mend;

*****
*****
* estimating the risk related to current use;
*****
*****

*****
* parameters;
*****

```

```

*****
%let cl=wald;
%let nb_controls=5; %let nb_controls=1;
%let output=condlogreg_current_&nb_controls_&cl.;
data &output.;
length selection $100. var_exp_1 $32. var_exp_2 $32. list_var_exp_9 $100.
nb_controls 3. cl $4.;
run;

*****
* estimation for each product;
*****

* medrogestone (code_1);
%condlogreg(var_exp_1=med_code_1_1a365, cl=&cl., nb_controls=&nb_controls.,
list_var_exp_9=med_code_7_1a1095 med_code_8_1a1095 med_code_9_1a1095,
list_var_strata=id_pat_case,
output=&output.);
* oral progesterone (code_2);
%condlogreg(var_exp_1=med_code_2_1a365, cl=&cl., nb_controls=&nb_controls.,
list_var_exp_9=med_code_7_1a1095 med_code_8_1a1095 med_code_9_1a1095,
list_var_strata=id_pat_case,
output=&output.);
* dydrogesterone (code_3);
%condlogreg(var_exp_1=med_code_3_1a365, cl=&cl., nb_controls=&nb_controls.,
list_var_exp_9=med_code_7_1a1095 med_code_8_1a1095 med_code_9_1a1095,
list_var_strata=id_pat_case,
output=&output.);
* dienogest (code_4);
%condlogreg(var_exp_1=med_code_4_1a365, cl=&cl., nb_controls=&nb_controls.,
list_var_exp_9=med_code_7_1a1095 med_code_8_1a1095 med_code_9_1a1095,
list_var_strata=id_pat_case,
output=&output.);
* promegestone (code_6);
%condlogreg(var_exp_1=med_code_6_1a365, cl=&cl., nb_controls=&nb_controls.,
list_var_exp_9=med_code_7_1a1095 med_code_8_1a1095 med_code_9_1a1095,
list_var_strata=id_pat_case,
output=&output.);
* medroxyprogesterone acetate (code_10);
%condlogreg(var_exp_1=med_code_10_1a365, cl=&cl., nb_controls=&nb_controls.,
list_var_exp_9=med_code_7_1a1095 med_code_8_1a1095 med_code_9_1a1095,
list_var_strata=id_pat_case,
output=&output.);
* percutaneous progesterone (code_22);
%condlogreg(var_exp_1=med_code_22_1a365, cl=&cl., nb_controls=&nb_controls.,
list_var_exp_9=med_code_7_1a1095 med_code_8_1a1095 med_code_9_1a1095,
list_var_strata=id_pat_case,
output=&output.);
* hydroxyprogesterone (code_30);
%condlogreg(var_exp_1=med_code_30_1a365, cl=&cl., nb_controls=&nb_controls.,
list_var_exp_9=med_code_7_1a1095 med_code_8_1a1095 med_code_9_1a1095,
list_var_strata=id_pat_case,
output=&output.);
* spironolactone (code_40);
%condlogreg(var_exp_1=med_code_40_1a365, cl=&cl., nb_controls=&nb_controls.,
list_var_exp_9=med_code_7_1a1095 med_code_8_1a1095 med_code_9_1a1095,
list_var_strata=id_pat_case,
output=&output.);
* IUS levonorgestrel 52mg (code_12) with restriction to index years 2011-2018
(annee_index_2011_2018=1);
%condlogreg(selection=(annee_index_2011_2018),
var_exp_1=med_code_12_1a1825, cl=&cl., nb_controls=&nb_controls.,
list_var_exp_9=med_code_7_1a1095 med_code_8_1a1095 med_code_9_1a1095,
list_var_strata=id_pat_case,
output=&output.);
* IUS levonorgestrel 13.5mg (code_14) with restriction to index years 2017-2018
(annee_index_2017_2018=1);
%condlogreg(selection=(annee_index_2017_2018),
var_exp_1=med_code_14_1a1095, cl=&cl., nb_controls=&nb_controls.,
list_var_exp_9=med_code_7_1a1095 med_code_8_1a1095 med_code_9_1a1095,

```

```

list_var_strata=id_pat_case,
output=&output.);
* copper IUS (diu_cuire) with restriction to index years 2011-2018
(annee_index_2011_2018=1);
%condlogreg(selection=(annee_index_2011_2018),
var_exp_1=diu_cuire_1a1825, cl=&cl., nb_controls=&nb_controls.,
list_var_exp_9=med_code_7_1a1095 med_code_8_1a1095 med_code_9_1a1095,
list_var_strata=id_pat_case,
output=&output.);
* nomegestrol acetate (code_7);
%condlogreg(var_exp_1=med_code_7_1a365, cl=&cl., nb_controls=&nb_controls.,
list_var_exp_9=med_code_9_1a1095,
list_var_strata=id_pat_case,
output=&output.);
* chlormadinone acetate (code_8);
%condlogreg(var_exp_1=med_code_8_1a365, cl=&cl., nb_controls=&nb_controls.,
list_var_exp_9=med_code_9_1a1095,
list_var_strata=id_pat_case,
output=&output.);
* cyproterone acetate (code_9);
%condlogreg(var_exp_1=med_code_9_1a365, cl=&cl., nb_controls=&nb_controls.,
list_var_strata=id_pat_case,
output=&output.);
*****
*****
* estimating the risk related to short-term and prolonged use, respectively;
*****
*****
*****
*****
* parameters;
*****

%let cl=wald;
%let nb_controls=5; %let nb_controls=1;
%let output=condlogreg_prolonged_&nb_controls_&cl.;
data &output.;
length selection $100. var_exp_1 $32. var_exp_2 $32. list_var_exp_9 $100.
nb_controls 3. cl $4.;
run;
*****
* estimation for each product;
*****
* medrogestone (code_1);
%condlogreg(var_exp_1=med_code_1_1a365, var_exp_2=med_code_1_366a730,
mode=short_prolonged, cl=&cl., nb_controls=&nb_controls.,
list_var_exp_9=med_code_7_1a1095 med_code_8_1a1095 med_code_9_1a1095,
list_var_strata=id_pat_case,
output=&output.);
* oral progesterone (code_2);
%condlogreg(var_exp_1=med_code_2_1a365, var_exp_2=med_code_2_366a730,
mode=short_prolonged, cl=&cl., nb_controls=&nb_controls.,
list_var_exp_9=med_code_7_1a1095 med_code_8_1a1095 med_code_9_1a1095,
list_var_strata=id_pat_case,
output=&output.);
* dydrogesterone (code_3);
%condlogreg(var_exp_1=med_code_3_1a365, var_exp_2=med_code_3_366a730,
mode=short_prolonged, cl=&cl., nb_controls=&nb_controls.,
list_var_exp_9=med_code_7_1a1095 med_code_8_1a1095 med_code_9_1a1095,
list_var_strata=id_pat_case,
output=&output.);
* dienogest (code_4);
%condlogreg(var_exp_1=med_code_4_1a365, var_exp_2=med_code_4_366a730,
mode=short_prolonged, cl=&cl., nb_controls=&nb_controls.,
list_var_exp_9=med_code_7_1a1095 med_code_8_1a1095 med_code_9_1a1095,
list_var_strata=id_pat_case,
output=&output.);
* promegestone (code_6);
%condlogreg(var_exp_1=med_code_6_1a365, var_exp_2=med_code_6_366a730,
mode=short_prolonged, cl=&cl., nb_controls=&nb_controls.,
list_var_exp_9=med_code_7_1a1095 med_code_8_1a1095 med_code_9_1a1095,

```

```

list_var_strata=id_pat_case,
output=&output.);
* medroxyprogesterone acetate (code_10);
%condlogreg(var_exp_1=med_code_10_1a365, var_exp_2=med_code_10_366a730,
mode=short_prolonged, cl=&cl., nb_controls=&nb_controls.,
list_var_exp_9=med_code_7_1a1095 med_code_8_1a1095 med_code_9_1a1095,
list_var_strata=id_pat_case,
output=&output.);
* percutaneous progesterone (code_22);
%condlogreg(var_exp_1=med_code_22_1a365, var_exp_2=med_code_22_366a730,
mode=short_prolonged, cl=&cl., nb_controls=&nb_controls.,
list_var_exp_9=med_code_7_1a1095 med_code_8_1a1095 med_code_9_1a1095,
list_var_strata=id_pat_case,
output=&output.);
* hydroxyprogesterone (code_30);
%condlogreg(var_exp_1=med_code_30_1a365, var_exp_2=med_code_30_366a730,
mode=short_prolonged, cl=&cl., nb_controls=&nb_controls.,
list_var_exp_9=med_code_7_1a1095 med_code_8_1a1095 med_code_9_1a1095,
list_var_strata=id_pat_case,
output=&output.);
* spironolactone (code_40);
%condlogreg(var_exp_1=med_code_40_1a365, var_exp_2=med_code_40_366a730,
mode=short_prolonged, cl=&cl., nb_controls=&nb_controls.,
list_var_exp_9=med_code_7_1a1095 med_code_8_1a1095 med_code_9_1a1095,
list_var_strata=id_pat_case,
output=&output.);
* nomegestrol acetate (code_7);
%condlogreg(var_exp_1=med_code_7_1a365, var_exp_2=med_code_7_366a730,
mode=short_prolonged, cl=&cl., nb_controls=&nb_controls.,
list_var_exp_9=med_code_9_1a1095,
list_var_strata=id_pat_case,
output=&output.);
* chlormadinone acetate (code_8);
%condlogreg(var_exp_1=med_code_8_1a365, var_exp_2=med_code_8_366a730,
mode=short_prolonged, cl=&cl., nb_controls=&nb_controls.,
list_var_exp_9=med_code_9_1a1095,
list_var_strata=id_pat_case,
output=&output.);
* cyproterone acetate (code_9);
%condlogreg(var_exp_1=med_code_9_1a365, var_exp_2=med_code_9_366a730,
mode=short_prolonged, cl=&cl., nb_controls=&nb_controls.,
list_var_strata=id_pat_case,
output=&output.);
*****
*****
* estimating the risk in subgroups and for specific localisations;
*****
*****
*****
*****
* parameters;
*****
%let cl=wald;
%let nb_controls=5;
%let output=condlogreg_subgroups_&nb_controls_&cl.;
data &output.;
length selection $100. var_exp_1 $32. var_exp_2 $32. list_var_exp_9 $100.
nb_controls 3. cl $4.;
run;

*****
*****
* estimation for each product;
*****
%macro loop(selection=(1), cl=, nb_controls=, output=);
* medrogestone (code_1);
%condlogreg(selection=(&selection.),
var_exp_1=med_code_1_1a365, cl=&cl., nb_controls=&nb_controls.,
list_var_exp_9=med_code_7_1a1095 med_code_8_1a1095 med_code_9_1a1095,
list_var_strata=id_pat_case,
output=&output.);
* promegestone (code_6);

```

```

%condlogreg(selection=(&selection.),
var_exp_1=med_code_6_1a365, cl=&cl., nb_controls=&nb_controls.,
list_var_exp_9=med_code_7_1a1095 med_code_8_1a1095 med_code_9_1a1095,
list_var_strata=id_pat_case,
output=&output.);
* medroxyprogesterone acetate (code_10);
%condlogreg(selection=(&selection.),
var_exp_1=med_code_10_1a365, cl=&cl., nb_controls=&nb_controls.,
list_var_exp_9=med_code_7_1a1095 med_code_8_1a1095 med_code_9_1a1095,
list_var_strata=id_pat_case,
output=&output.);
* nomegestrol acetate (code_7);
%condlogreg(selection=(&selection.),
var_exp_1=med_code_7_1a365, cl=&cl., nb_controls=&nb_controls.,
list_var_exp_9=med_code_9_1a1095,
list_var_strata=id_pat_case,
output=&output.);
* chlormadinone acetate (code_8);
%condlogreg(selection=(&selection.),
var_exp_1=med_code_8_1a365, cl=&cl., nb_controls=&nb_controls.,
list_var_exp_9=med_code_9_1a1095,
list_var_strata=id_pat_case,
output=&output.);
* cyproterone acetate (code_9);
%condlogreg(selection=(&selection.),
var_exp_1=med_code_9_1a365, cl=&cl., nb_controls=&nb_controls.,
list_var_strata=id_pat_case,
output=&output.);
%mend;
* age : < 35 years;
%loop(selection=(age_cl in (1,2)),
cl=&cl., nb_controls=&nb_controls., output=&output.);
* age : 35-44 years
%loop(selection=(age_cl=3),
cl=&cl., nb_controls=&nb_controls., output=&output.);
* age : 45-54 years;
%loop(selection=(age_cl=4),
cl=&cl., nb_controls=&nb_controls., output=&output.);
* age : 55-64; years
%loop(selection=(age_cl=5),
cl=&cl., nb_controls=&nb_controls., output=&output.);
* age : 65 years and over;
%loop(selection=(age_cl in (6,7,8)),
cl=&cl., nb_controls=&nb_controls., output=&output.);
* anatomical location : anterior base of the skull;
%loop(selection=(localisation_ant_case=1),
cl=&cl., nb_controls=&nb_controls., output=&output.);
* anatomical location : mid-base of the skull;
%loop(selection=(localisation_mid_case=1),
cl=&cl., nb_controls=&nb_controls., output=&output.);
* anatomical location : posterior base of the skull;
%loop(selection=(localisation_post_case=1),
cl=&cl., nb_controls=&nb_controls., output=&output.);
* anatomical location : convexity;
%loop(selection=(localisation_conv_case=1),
cl=&cl., nb_controls=&nb_controls., output=&output.);
* anatomical location : falx cerebri and tentorium;
%loop(selection=(localisation_falx_case=1),
cl=&cl., nb_controls=&nb_controls., output=&output.);
* anatomical location : others;
%loop(selection=(localisation_oth_case=1),
cl=&cl., nb_controls=&nb_controls., output=&output.);
* severity : benign;
%loop(selection=(grade_ben_case=1),
cl=&cl., nb_controls=&nb_controls., output=&output.);
* severity : atypical;
%loop(selection=(grade_atyp_case=1),
cl=&cl., nb_controls=&nb_controls., output=&output.);
* severity : malignant;
%loop(selection=(grade_mal_case=1),
cl=&cl., nb_controls=&nb_controls., output=&output

```



**Figure A. Flowchart for the analysis of levonorgestrel 52 mg IUS (restricted inclusion period: 2011-2018)**

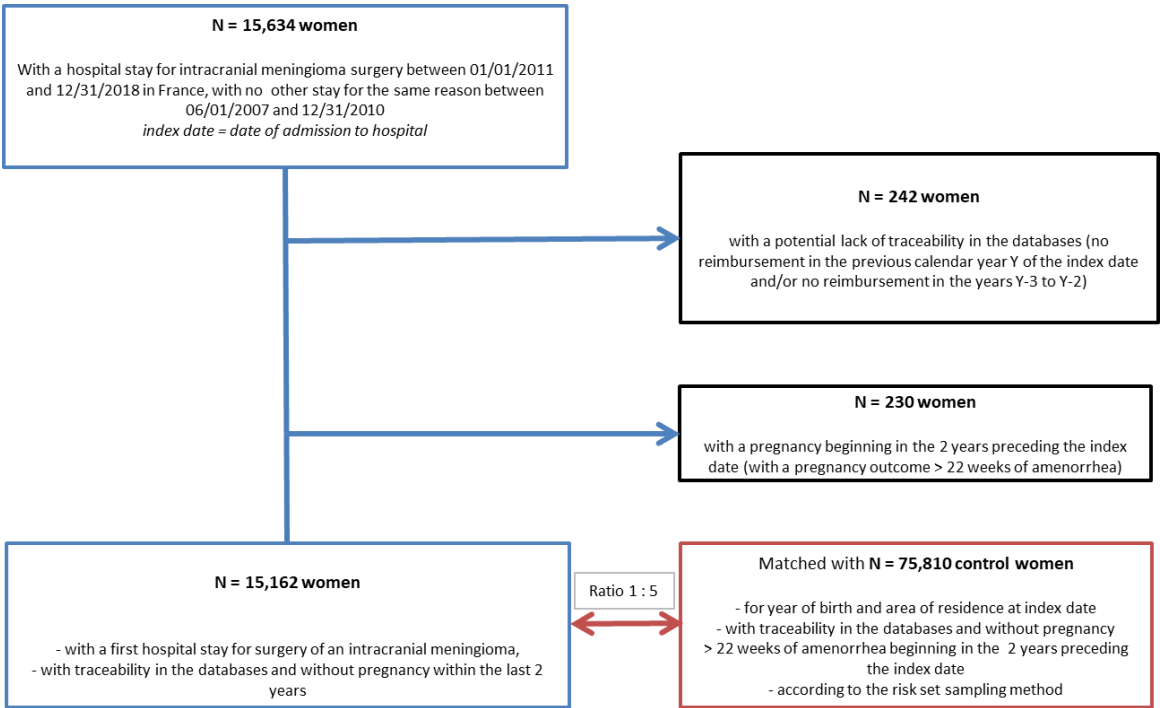

**Figure B. Flowchart for the analysis of levonorgestrel 13.5 mg IUS (restricted inclusion period: 2017-2018)**

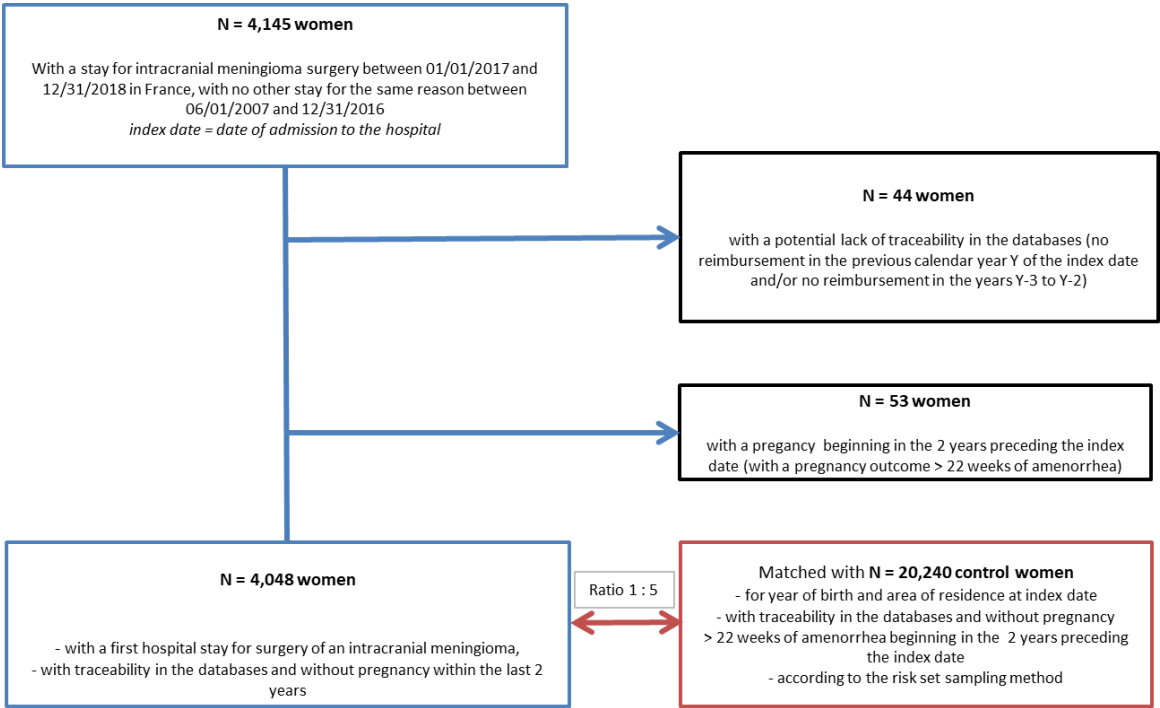



**Figure C. Forest plot representing the associations between exposure to oral, intravaginal, intramuscular, or percutaneous progestogens and the risk of meningioma requiring surgery**

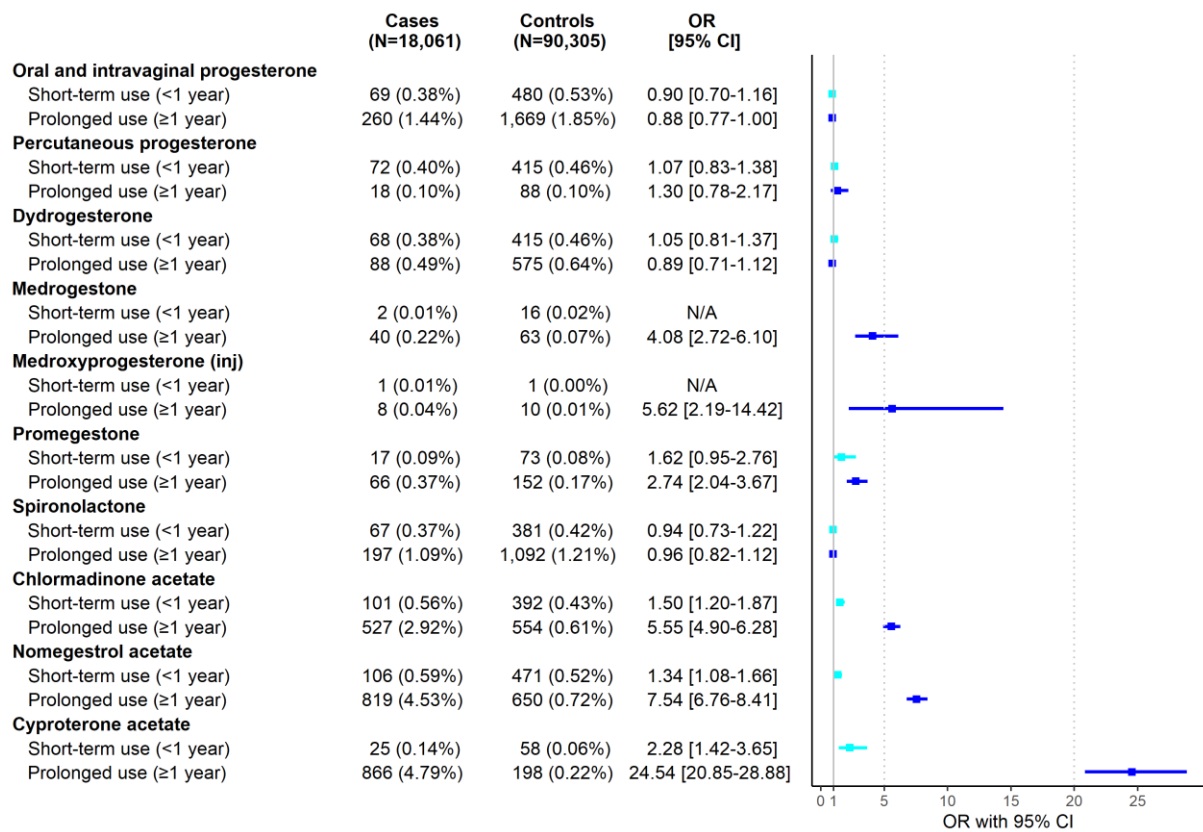

Abbreviations: CI, confidence interval; OR, odds ratio.

Short-term use: at least one dispensation in the year preceding the index date, without dispensation in the year before that (use in the year preceding the index date but not in the year before that)

Prolonged use: at least one dispensation in the year preceding the index date, with at least one dispensation in the year before that (use in the year preceding the index date and in the year before that)

For short and prolonged exposures: absence of exposure to chlormadinone acetate, nomegestrol acetate, and cyproterone acetate in the 3 years preceding the index date (in the analyses for chlormadinone acetate and nomegestrol acetate, the absence of exposure was tested only against cyproterone acetate; in the analysis for cyproterone acetate, no absence of exposure was tested)

The odds ratios for fewer than 6 exposed cases are not displayed. Therefore, hydroxyprogesterone and dienogest are missing in this forest plot

**Figure D. Number of attributable cases of intracranial meningioma requiring surgery, by progestogen, for the 2009-2018 period**

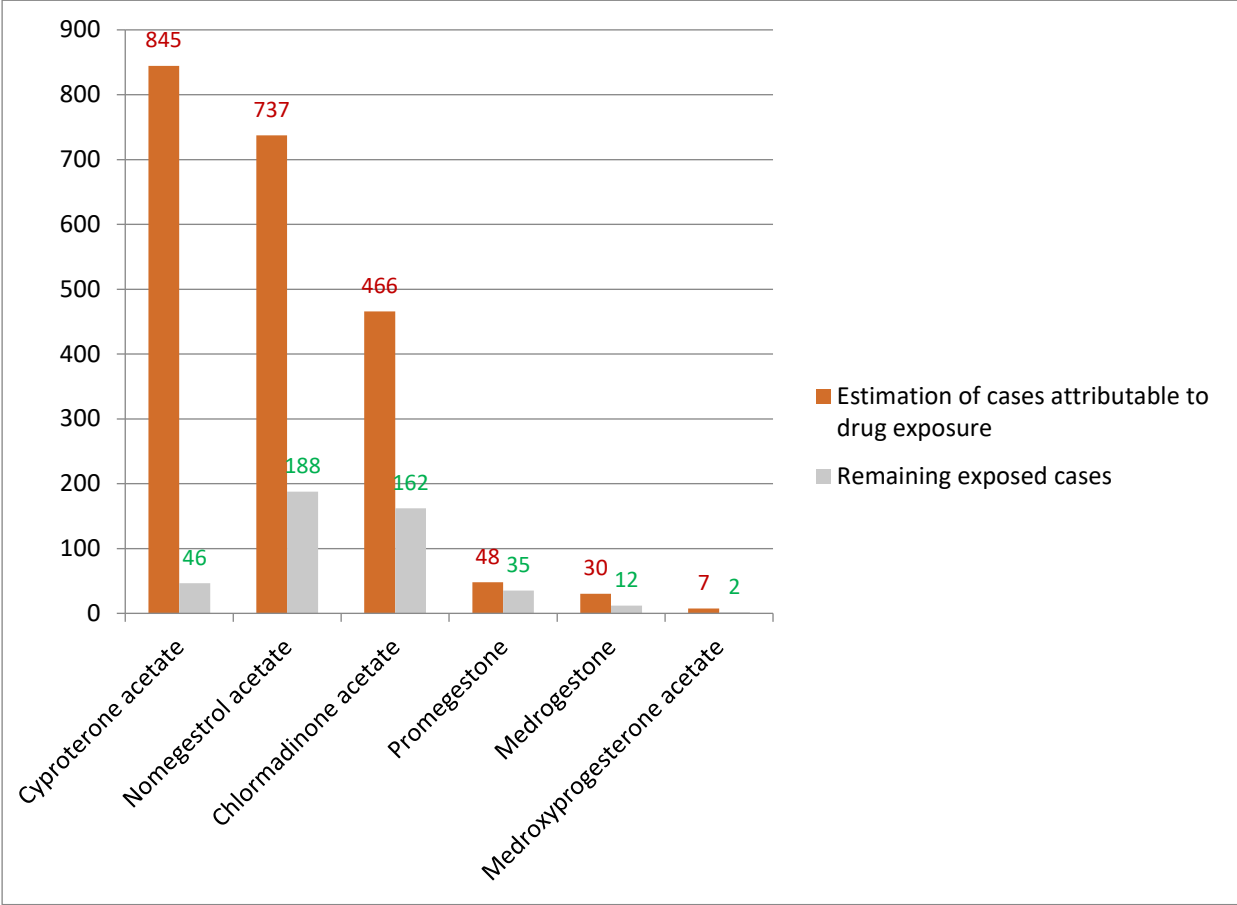

Abbreviations: CMA, chlormadinone acetate; ; CPA, cyproterone acetate; NOMAC, nomegestrel acetate.

Medrogestone, promegestestone and medroxyprogesterone acetate: cases with simultaneous/prior exposure to chlormadinone, nomegestrol and/or cyproterone acetate in the previous 3 years are excluded from the calculation.

Chlormadinone and nomegestrol acetate: cases with simultaneous/prior exposure to cyproterone acetate in the previous 3 years are excluded from the calculation.

All of the calculations relate to the source population of this study, which is dynamic and, notably, excludes women with a pregnancy beginning in the previous 2 years.
